# Supplementary material for: Mn doped ZrO2 as a green, efficient and reusable heterogeneous catalyst for the multicomponent synthesis of pyrano[2,3-d]-pyrimidine derivatives
Source: Royal Society of Chemistry journal article supplement (doi:10.1039/c5ra06373f), 2015-01-01
Supplement: c5ra06373f1.pdf [file c5ra06373f1.pdf]

**Mn doped ZrO<sub>2</sub> as a green, efficient and reusable heterogeneous catalyst  
for the multicomponent synthesis of pyrano[2,3-*d*]-pyrimidine derivatives**

Surya Narayana Maddila, Suresh Maddila, Werner E. van Zyl, Sreekantha B. Jonnalagadda\*

*\*School of Chemistry & Physics, University of KwaZulu-Natal, Westville Campus, Chiltern  
Hills, Durban-4000, South Africa*

| <b>Contents</b>                                                               | <b>Pages</b> |
|-------------------------------------------------------------------------------|--------------|
| Materials, methods and instruments                                            | <b>2</b>     |
| Catalysts Characterization                                                    | <b>2</b>     |
| Spectra's of substituted pyrano[2,3- <i>d</i> ]-pyrimidine derivatives (4a-k) | <b>3-34</b>  |

## **Materials, methods and instruments**

All chemicals and reagents required for the reaction were of analytical grade and were used without any further purification. Bruker AMX NMR spectrometer was used to record the  $^1\text{H}$  NMR,  $^{13}\text{C}$  NMR and  $^{15}\text{N}$  NMR spectral values. The  $\text{DMSO-d}_6$  solution was utilized for this while TMS served as the internal standard. TMS was further used as an internal standard for reporting the all chemical shifts in  $\delta$  (ppm). The FT-IR spectrum for the samples was established using a Perkin Elmer Precisely 100 FT-IR spectrometer at the 400-4000  $\text{cm}^{-1}$  area. Purity of all the reaction products was confirmed by TLC using aluminum plates coated with silica gel (Merck Kieselgel 60 F254).

### **Characterization of Catalysts**

Micromeritics Tristar-II porosity and surface area analyzer was used estimation of pore size, pore volume and surface area of the catalysts. BJH adsorption-desorption curves were obtained at  $-196\text{ }^\circ\text{C}$ , to assess the particulate properties of the catalyst. All the catalyst materials were degassed by passing nitrogen overnight at  $200\text{ }^\circ\text{C}$ . Bruker D8 advance instrument with a Cu K radiation source by  $\lambda = 1.5406$  was used for the X-ray diffraction data for the catalyst. Jeol JEM-1010 electron microscope and JEOL JSM-6100 microscope were used for TEM and SEM analysis respectively. In TEM analysis for particles distribution, size of 40-60 particles were averaged and with standard deviation. An emission current ( $100\text{ }\mu\text{A}$ ) by a Tungsten (W) filament with 12 kV accelerator voltage was employed for EDX-analysis of the SEM images. Elemental composition of the catalyst materials was established by using Inductively Coupled Plasma Optical Emission Spectrometer (Optima 5300 DV).

Spectra's of substituted pyrano[2,3-*d*]-pyrimidine derivatives (4a-k).

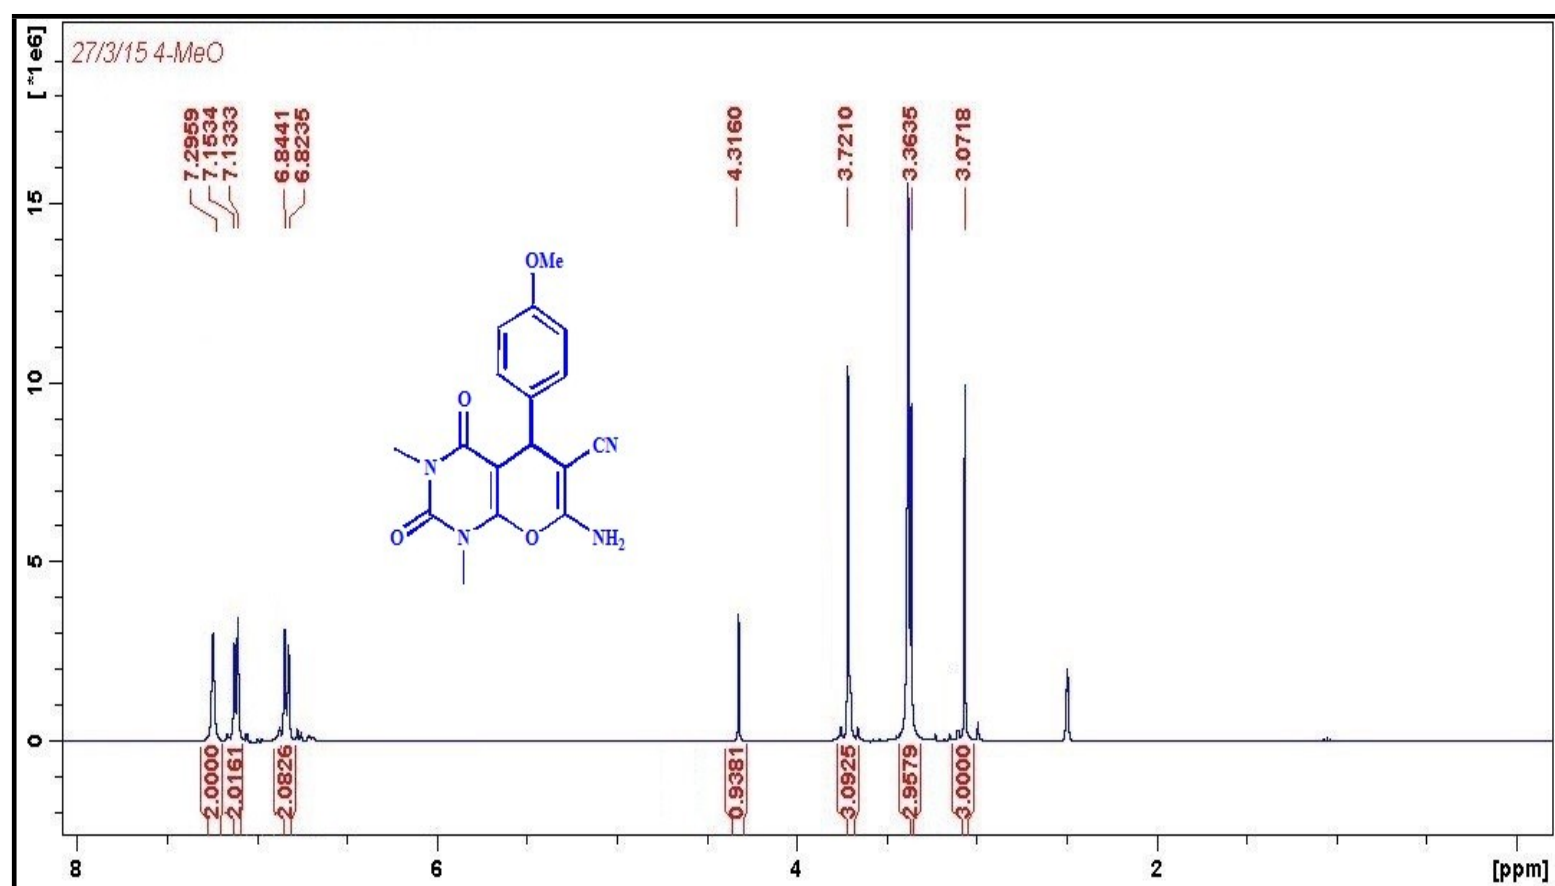

<sup>1</sup>H NMR spectra of compound 4a

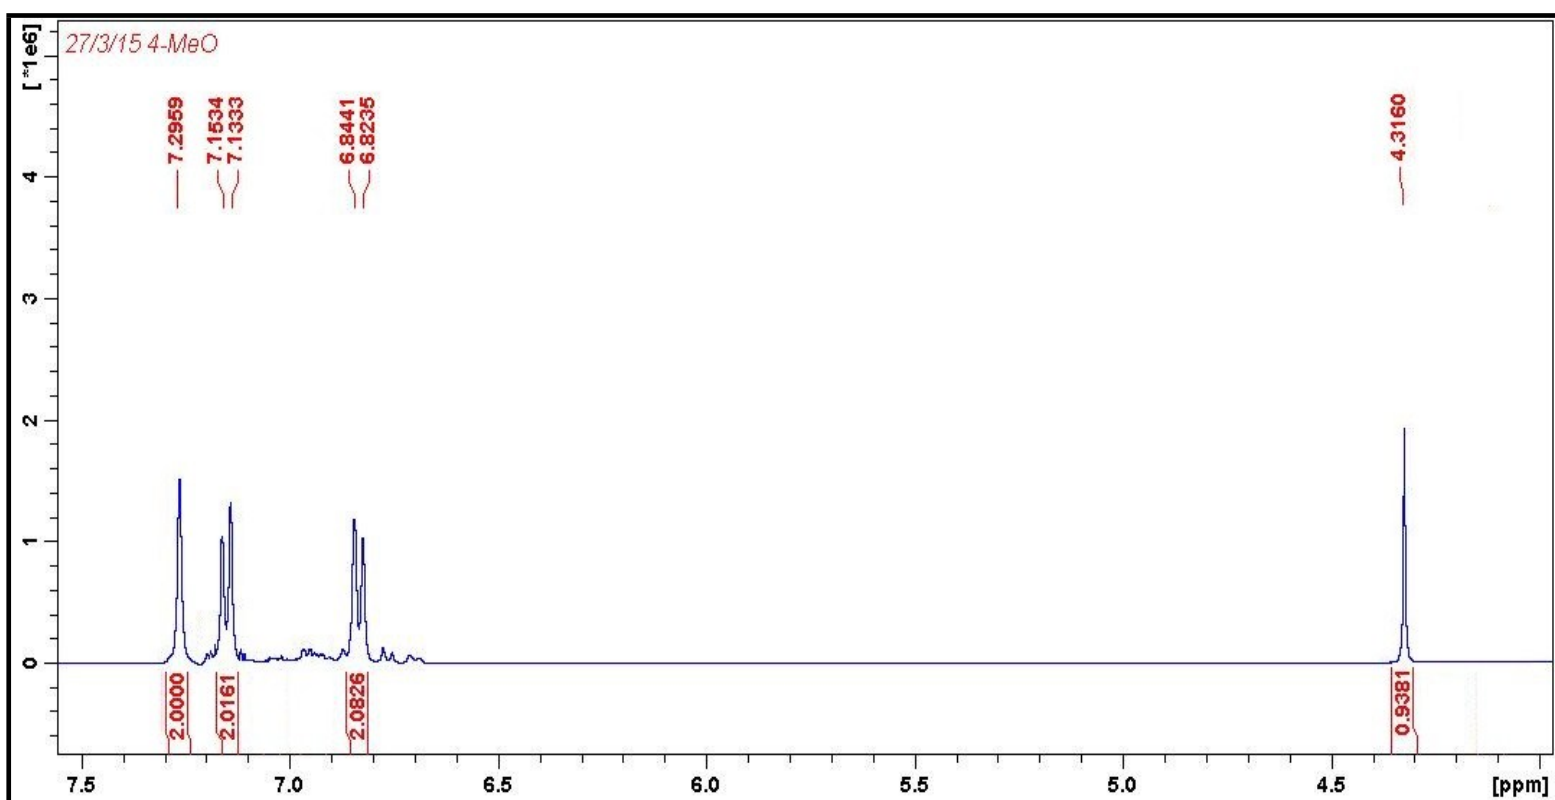

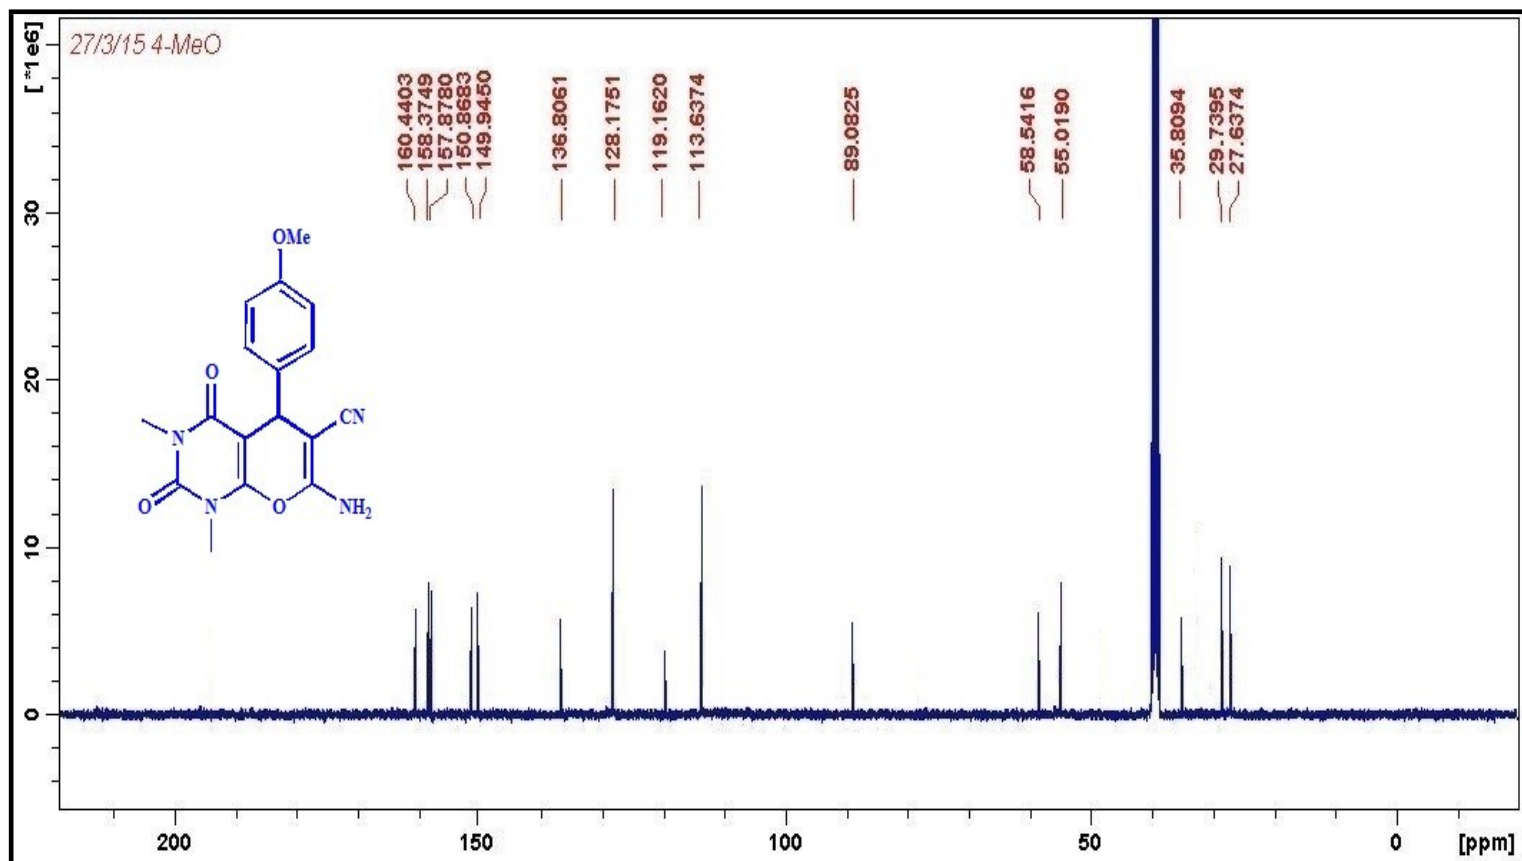

<sup>13</sup>C NMR spectra of compound 4a

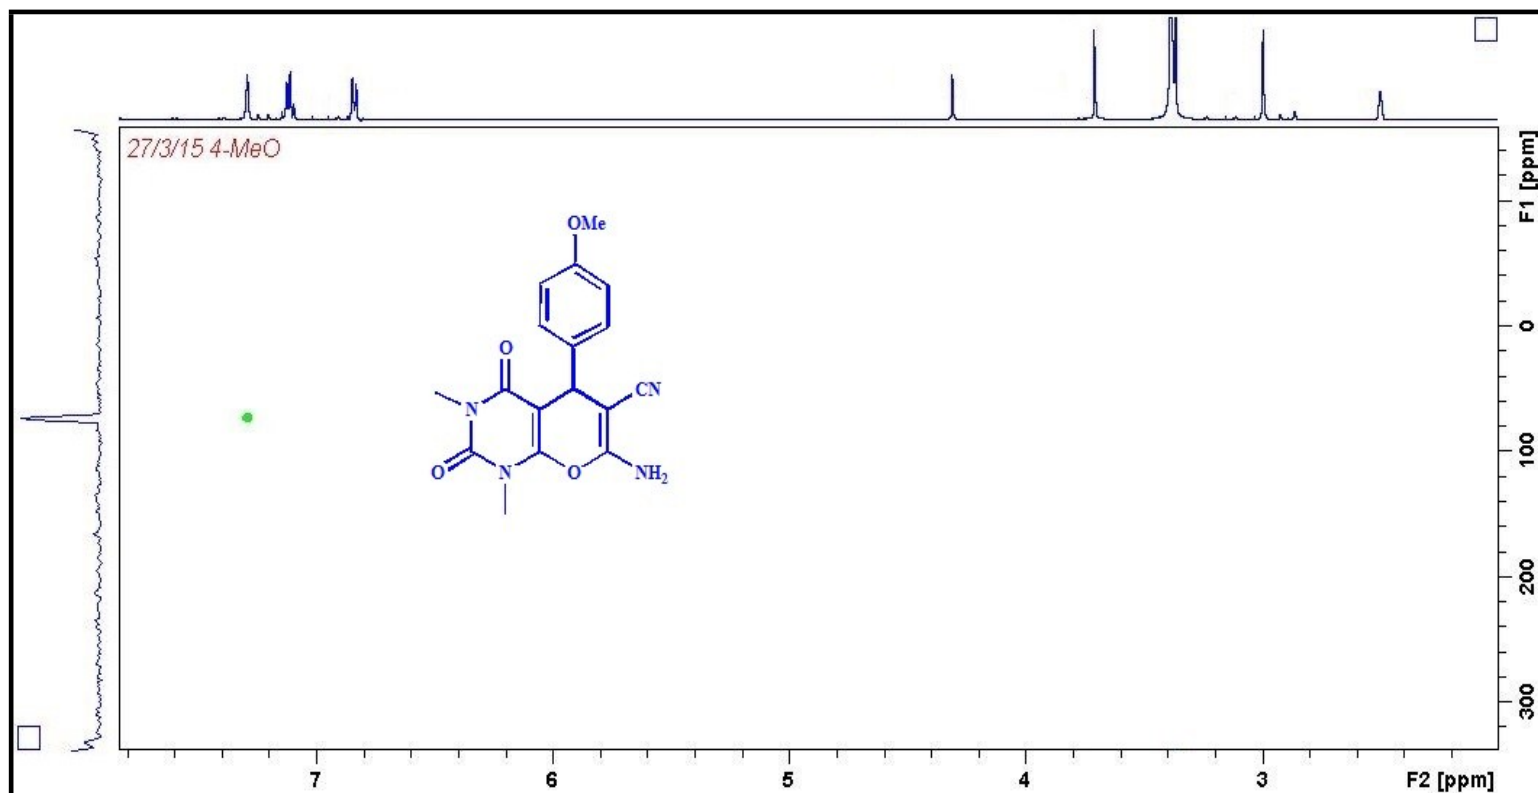

<sup>15</sup>N NMR (GHSQC) spectra of compound 4a

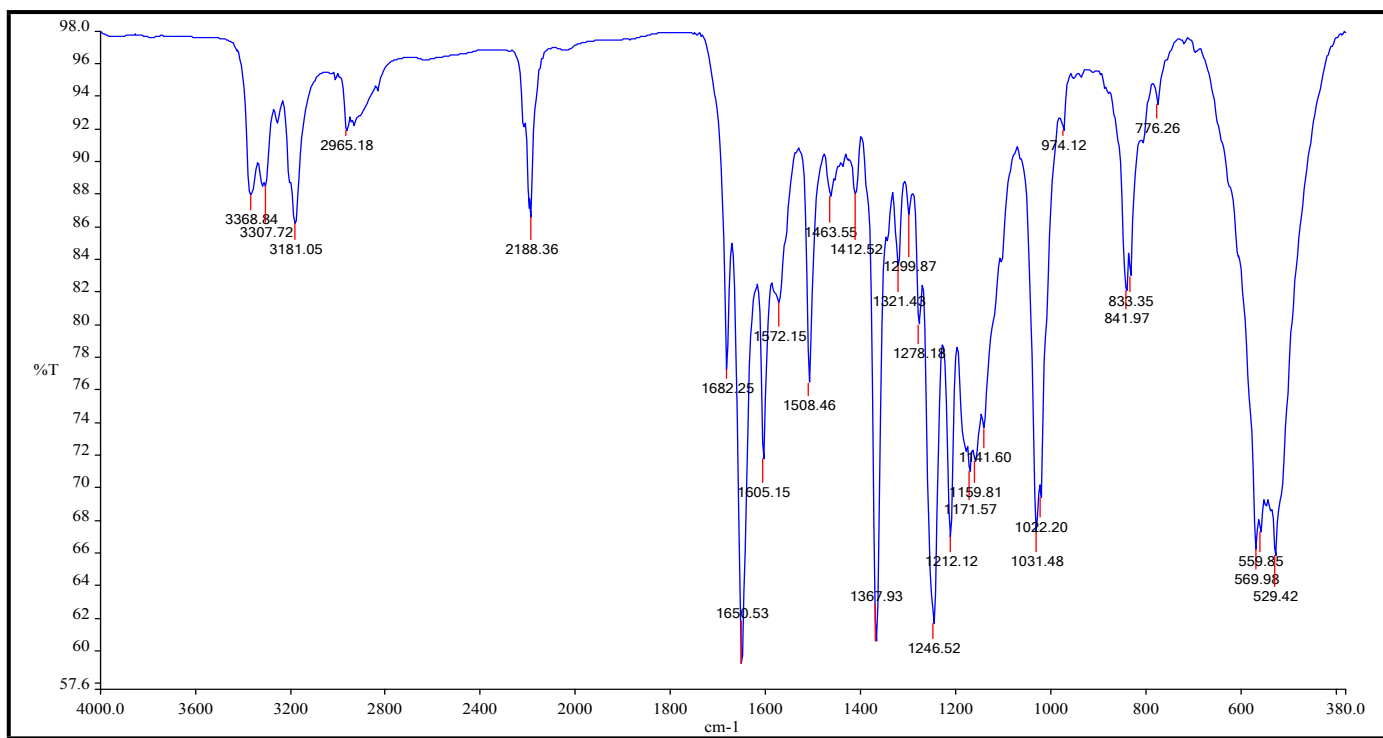

**FT-IR spectra of compound 4a**

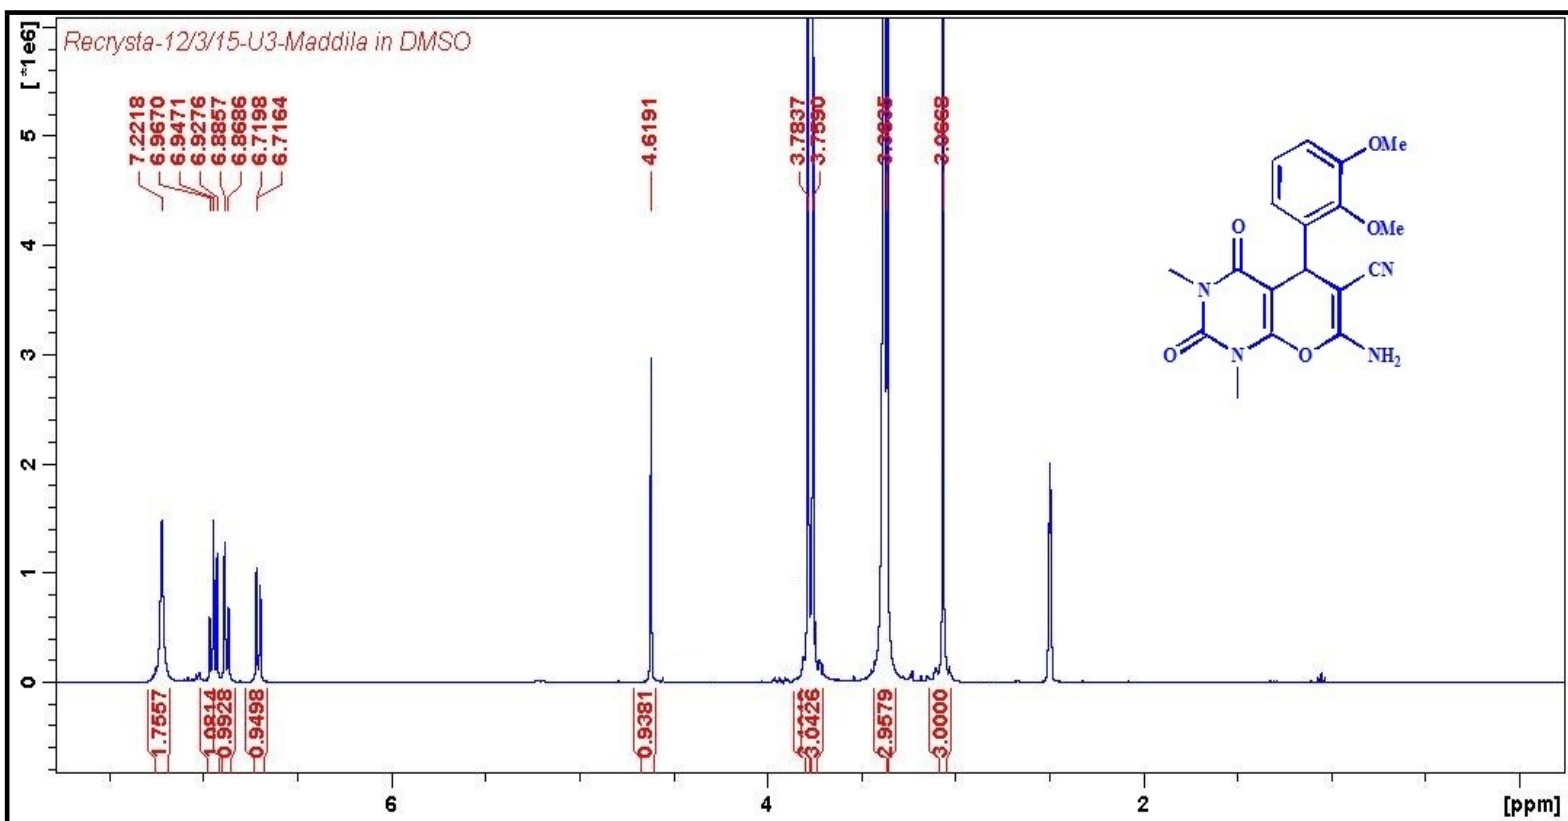

<sup>1</sup>H NMR spectra of compound 4b

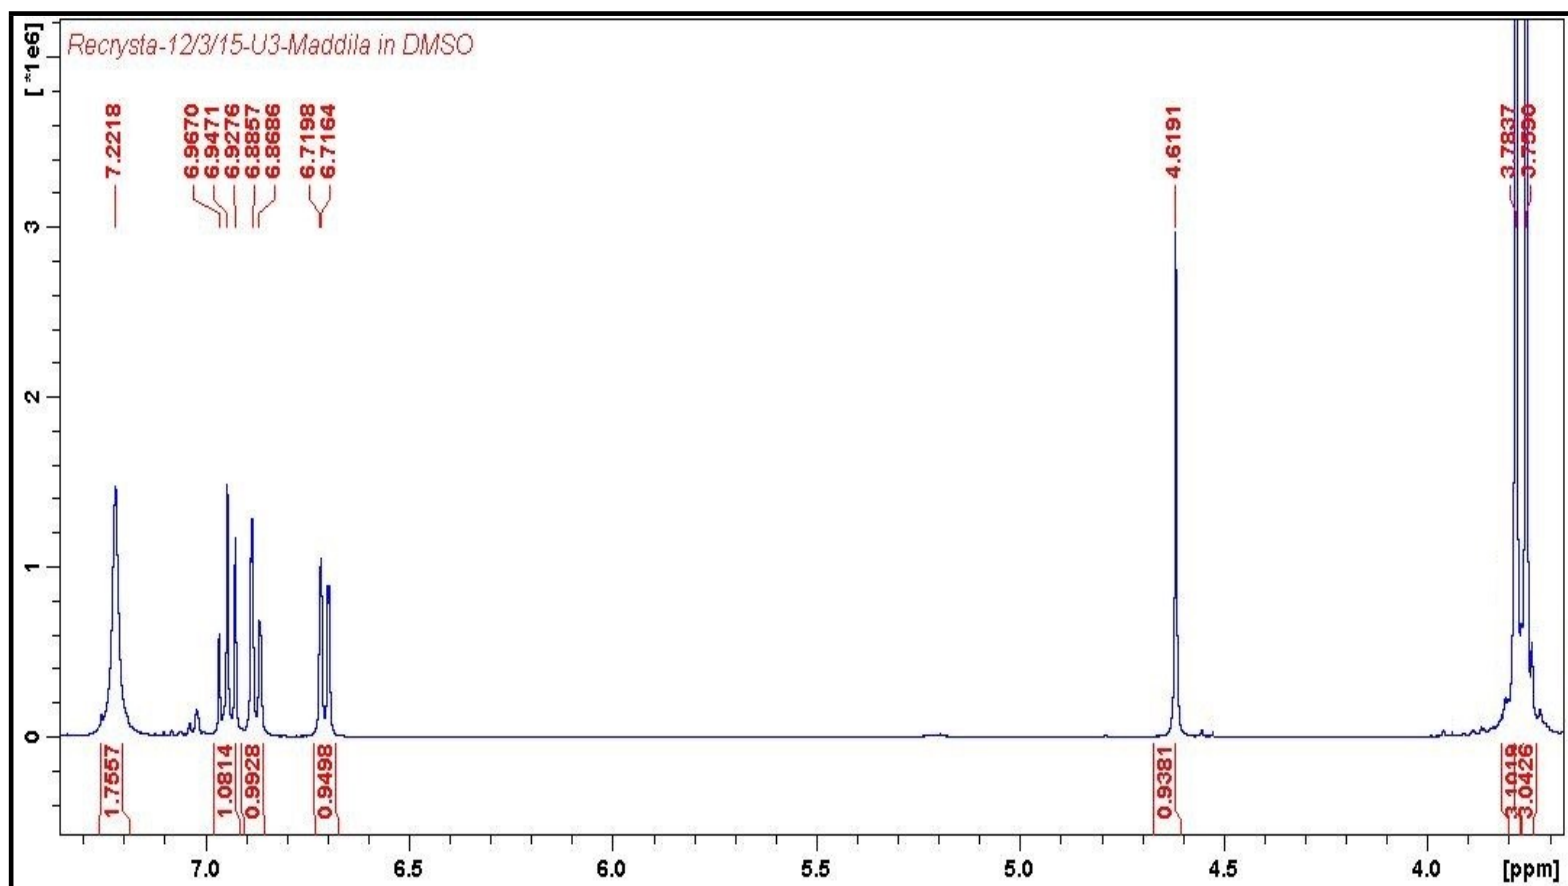

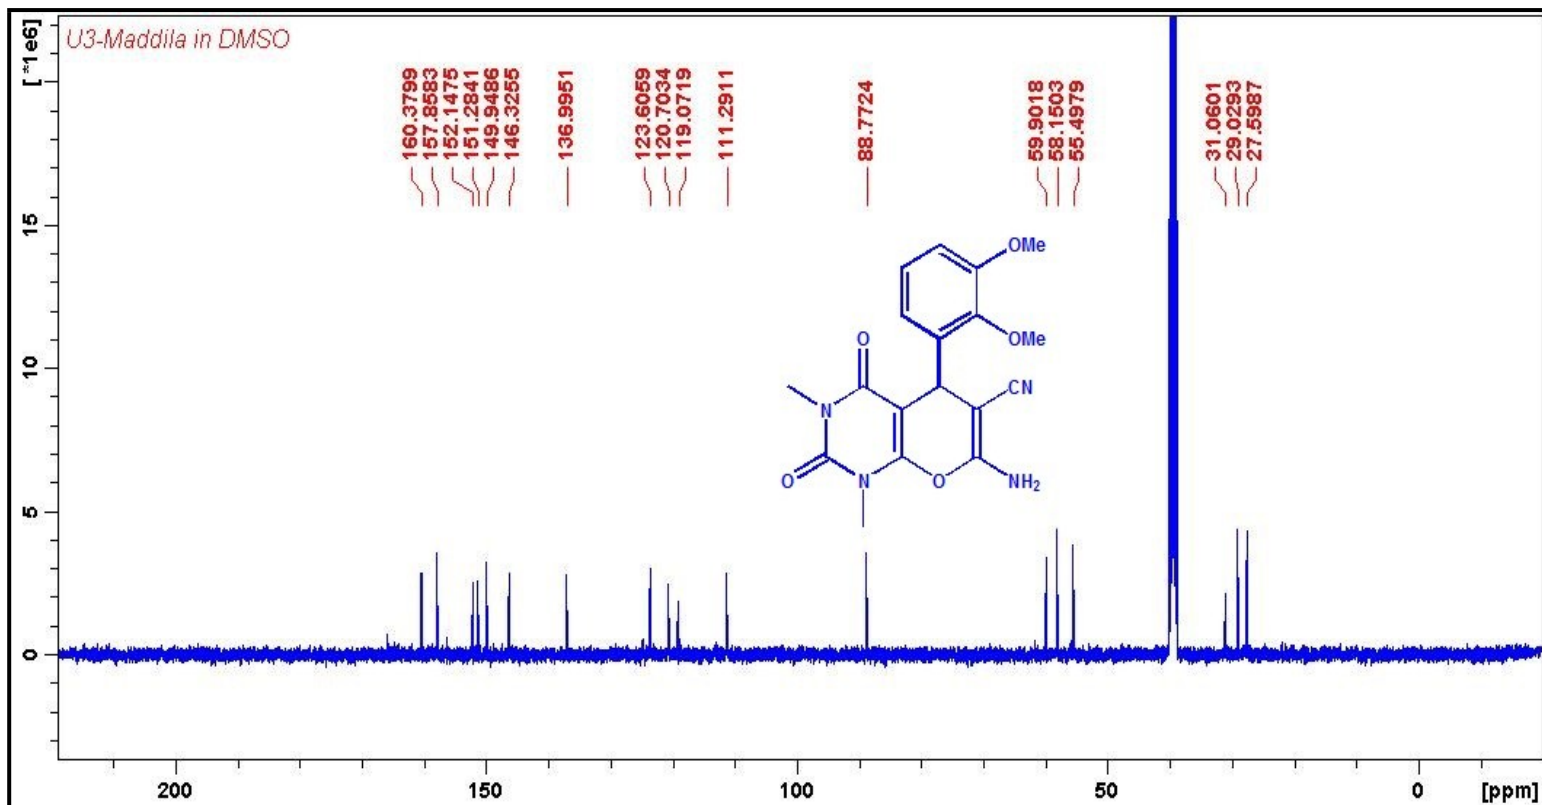

<sup>13</sup>C NMR spectra of compound 4b

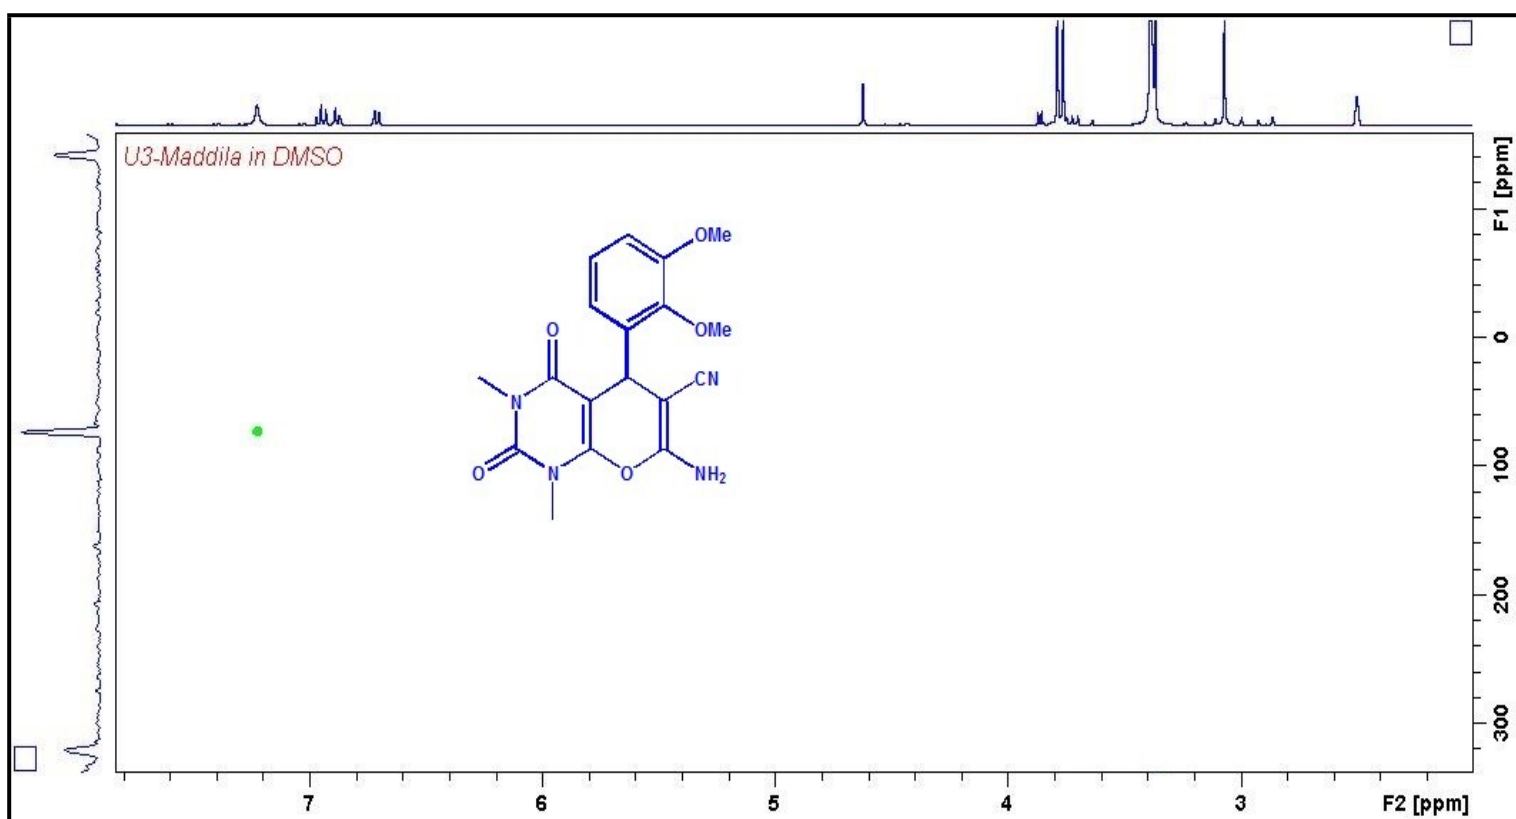

<sup>15</sup>N NMR (GHSQC) spectra of compound 4b

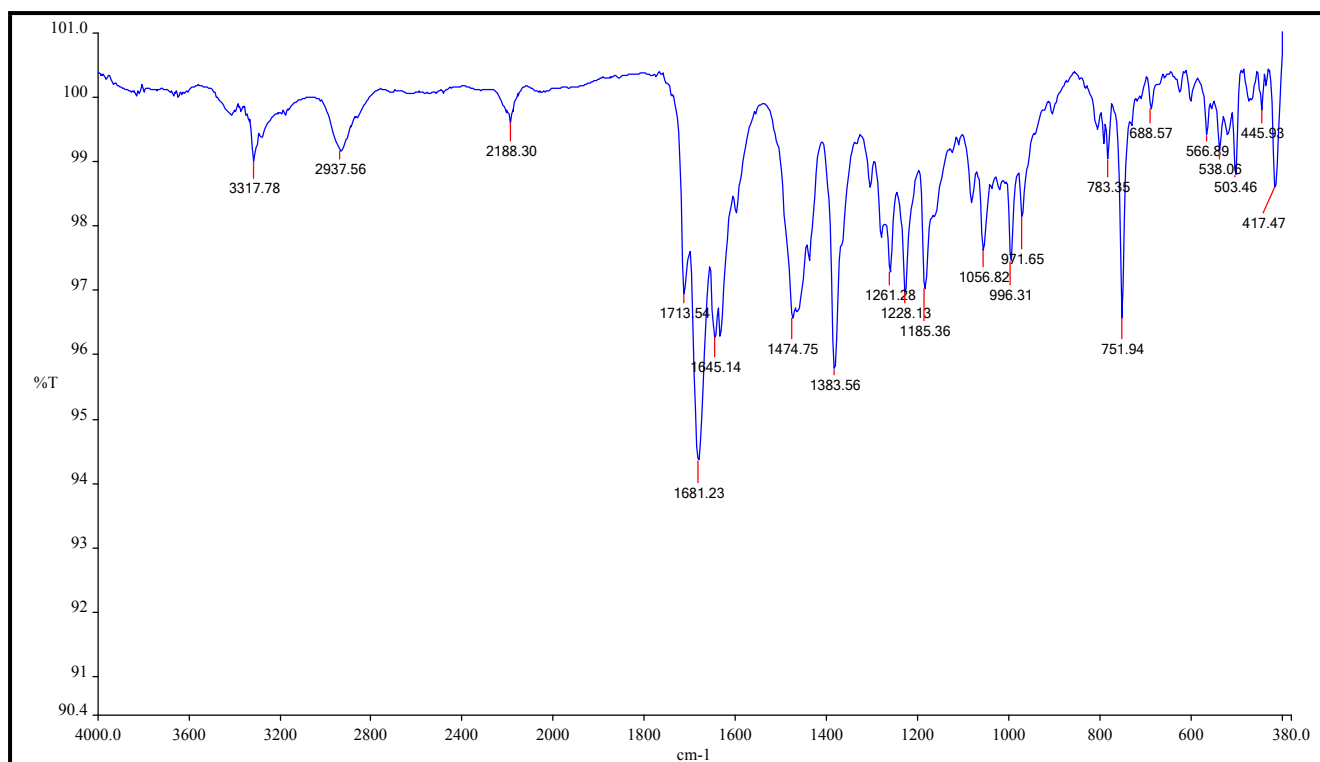

**FT-IR spectra of compound 4b**



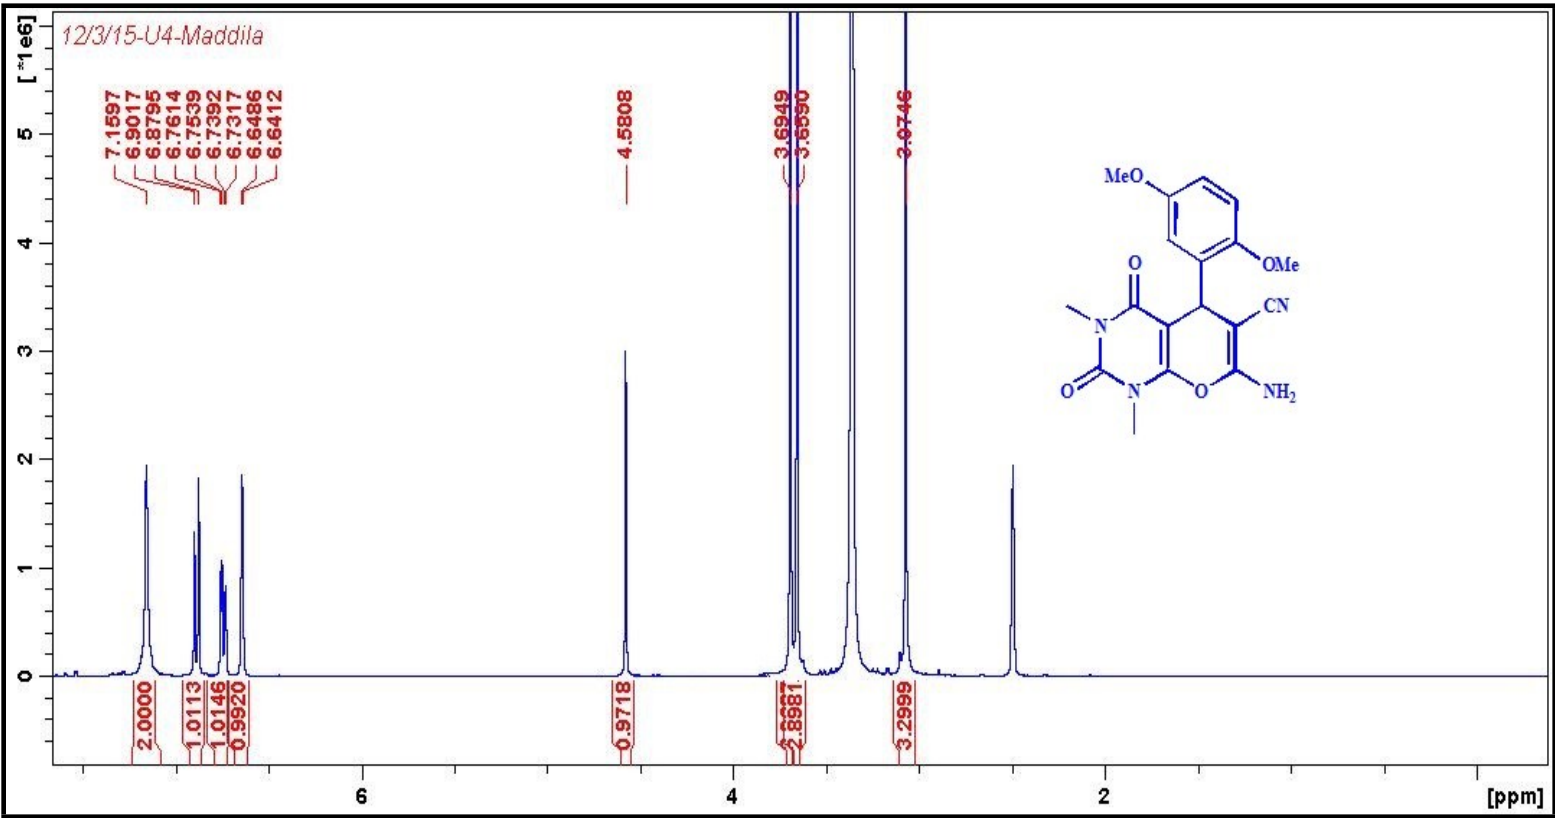

<sup>1</sup>H NMR spectra of compound 4c

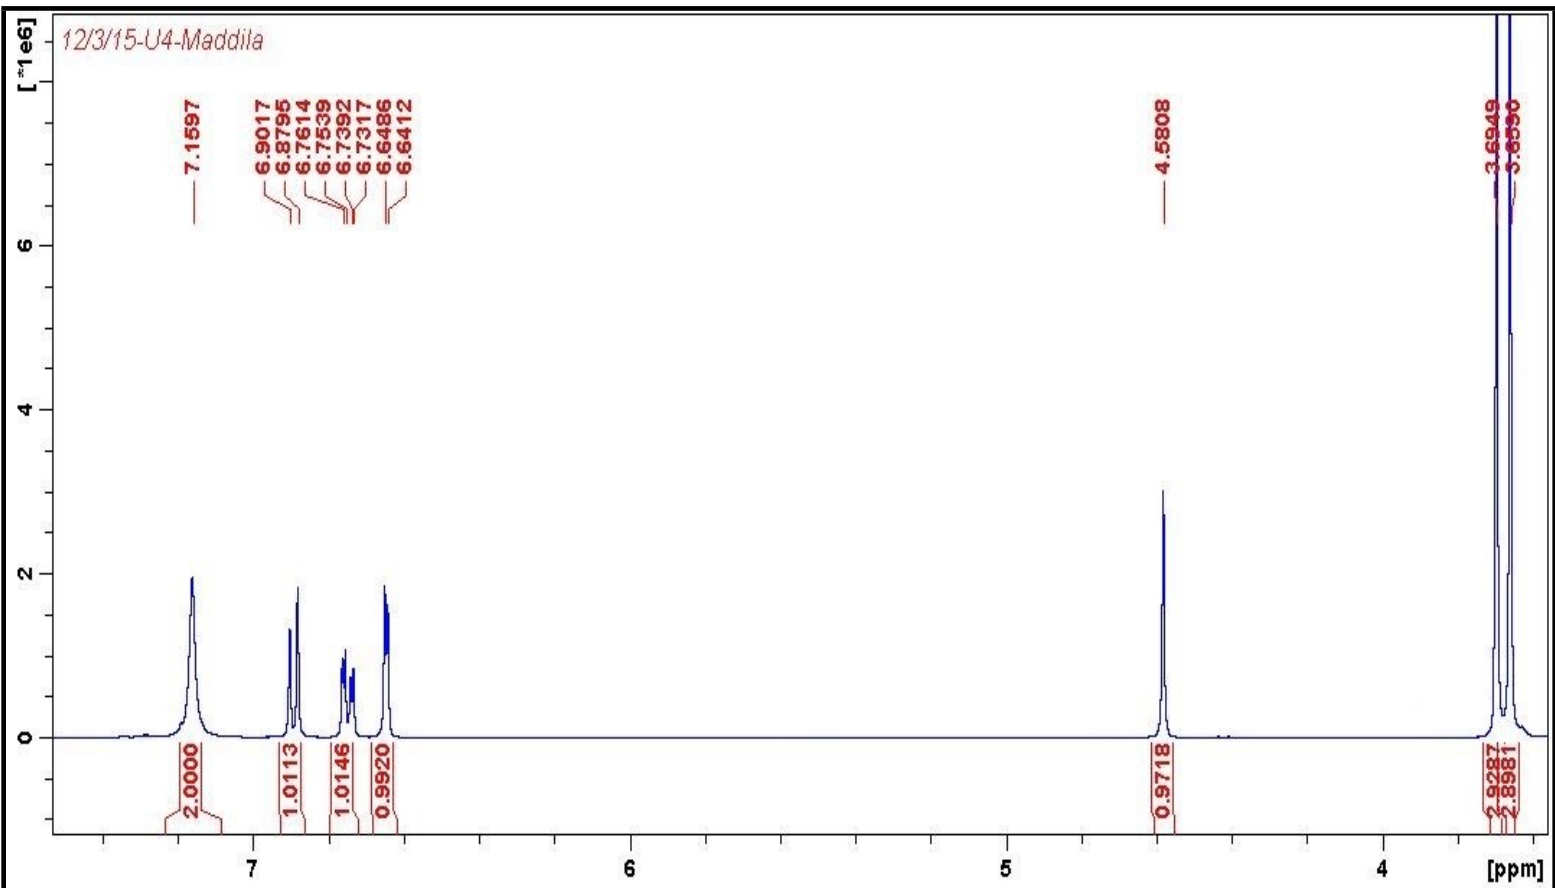

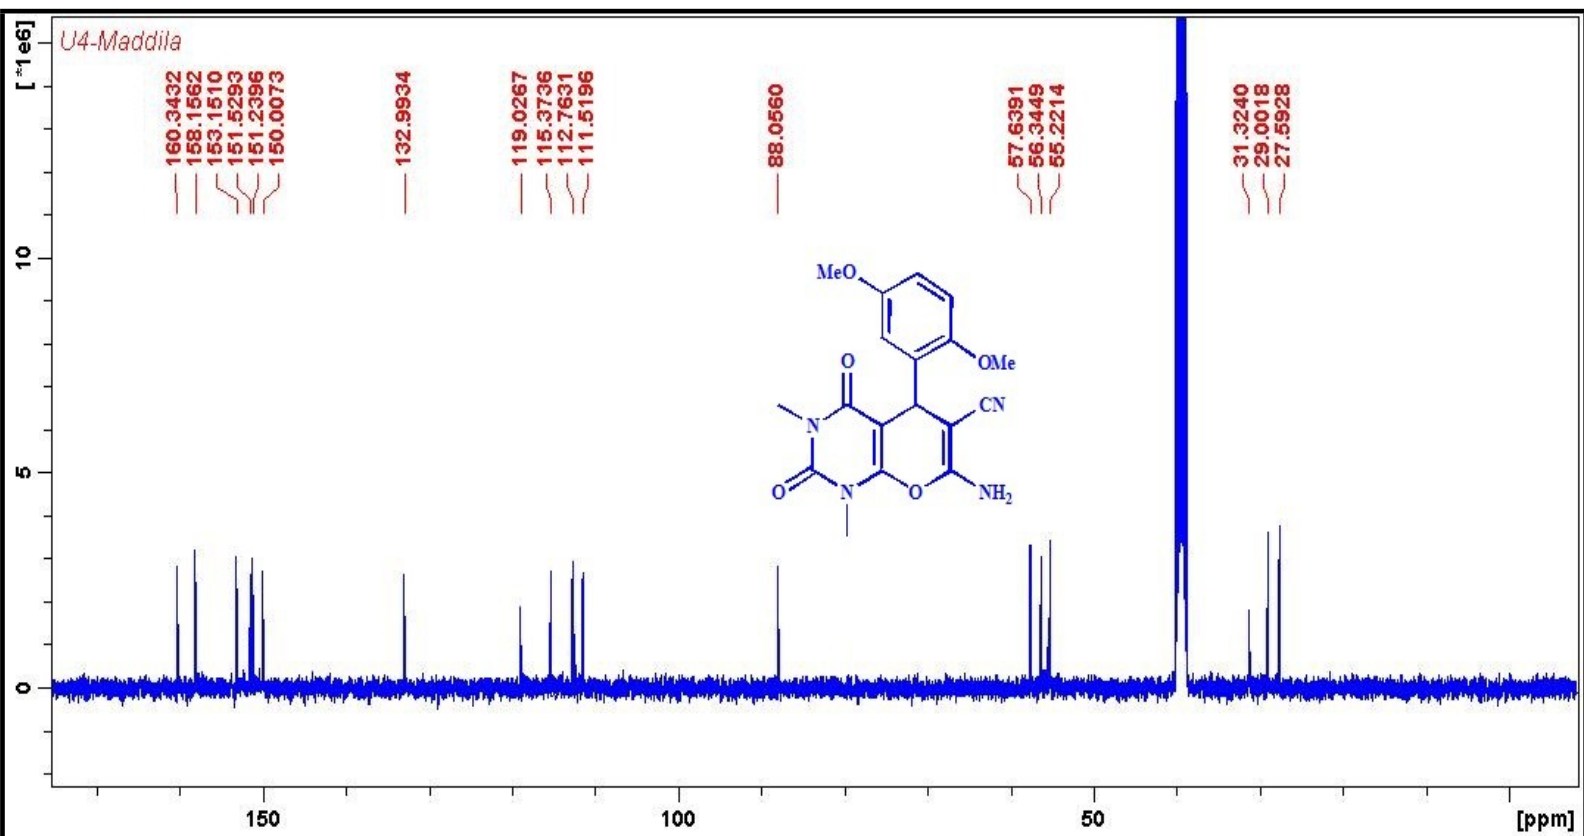

<sup>13</sup>C NMR spectra of compound 4c

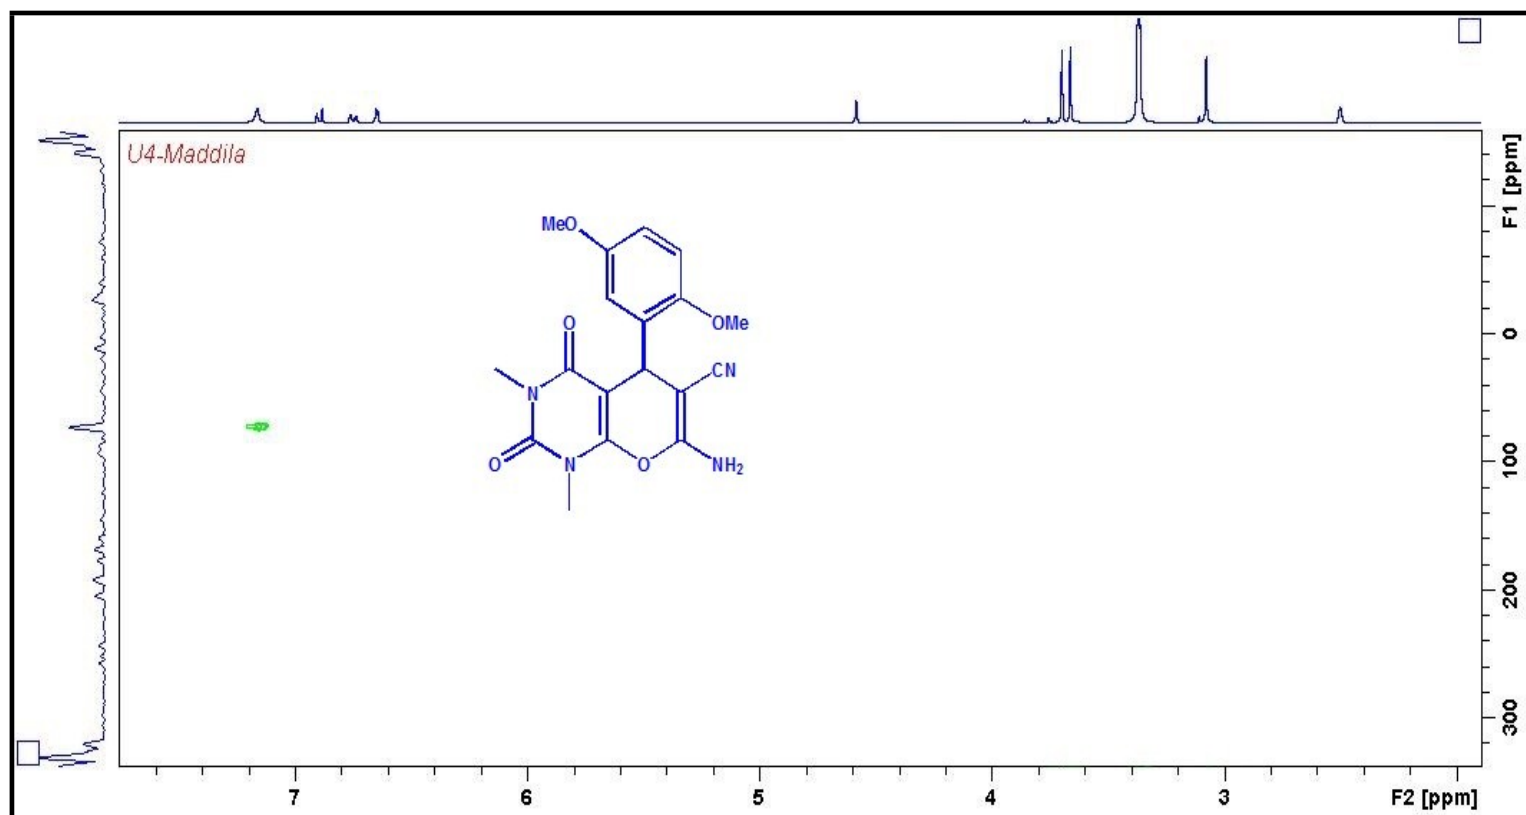

<sup>15</sup>N NMR (GHSQC) spectra of compound 4c

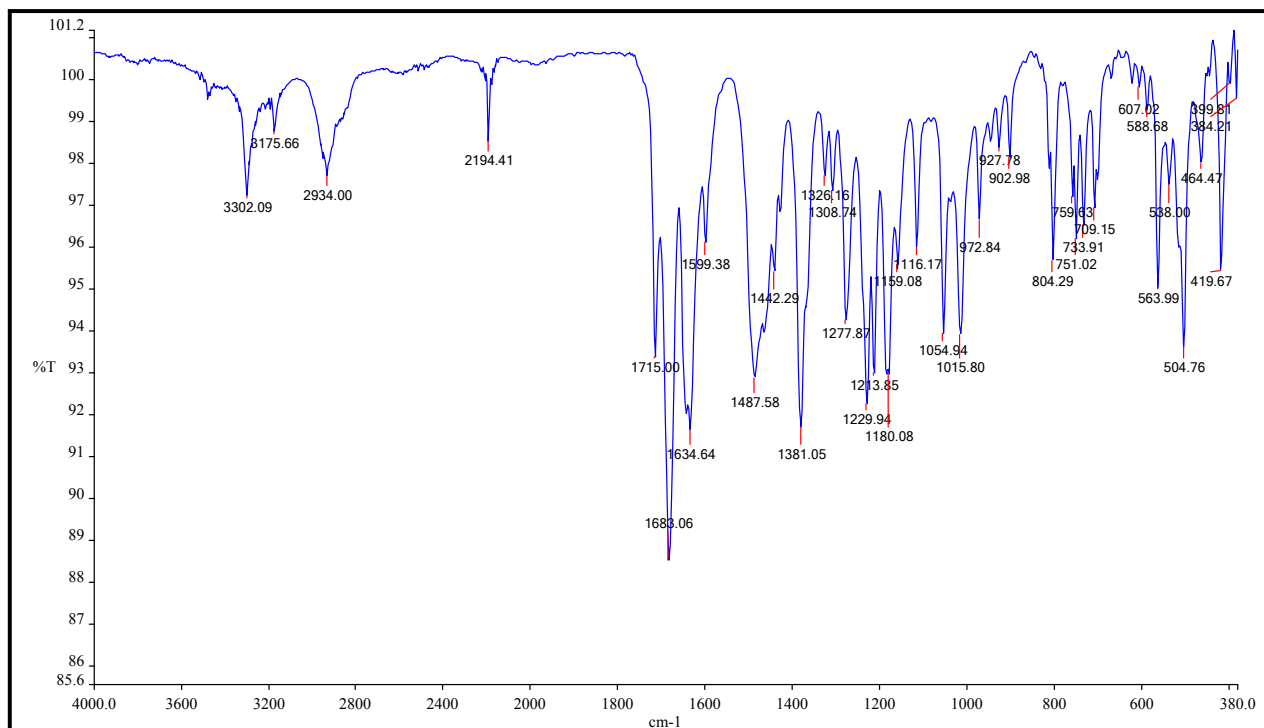

**FT-IR spectra of compound 4c**

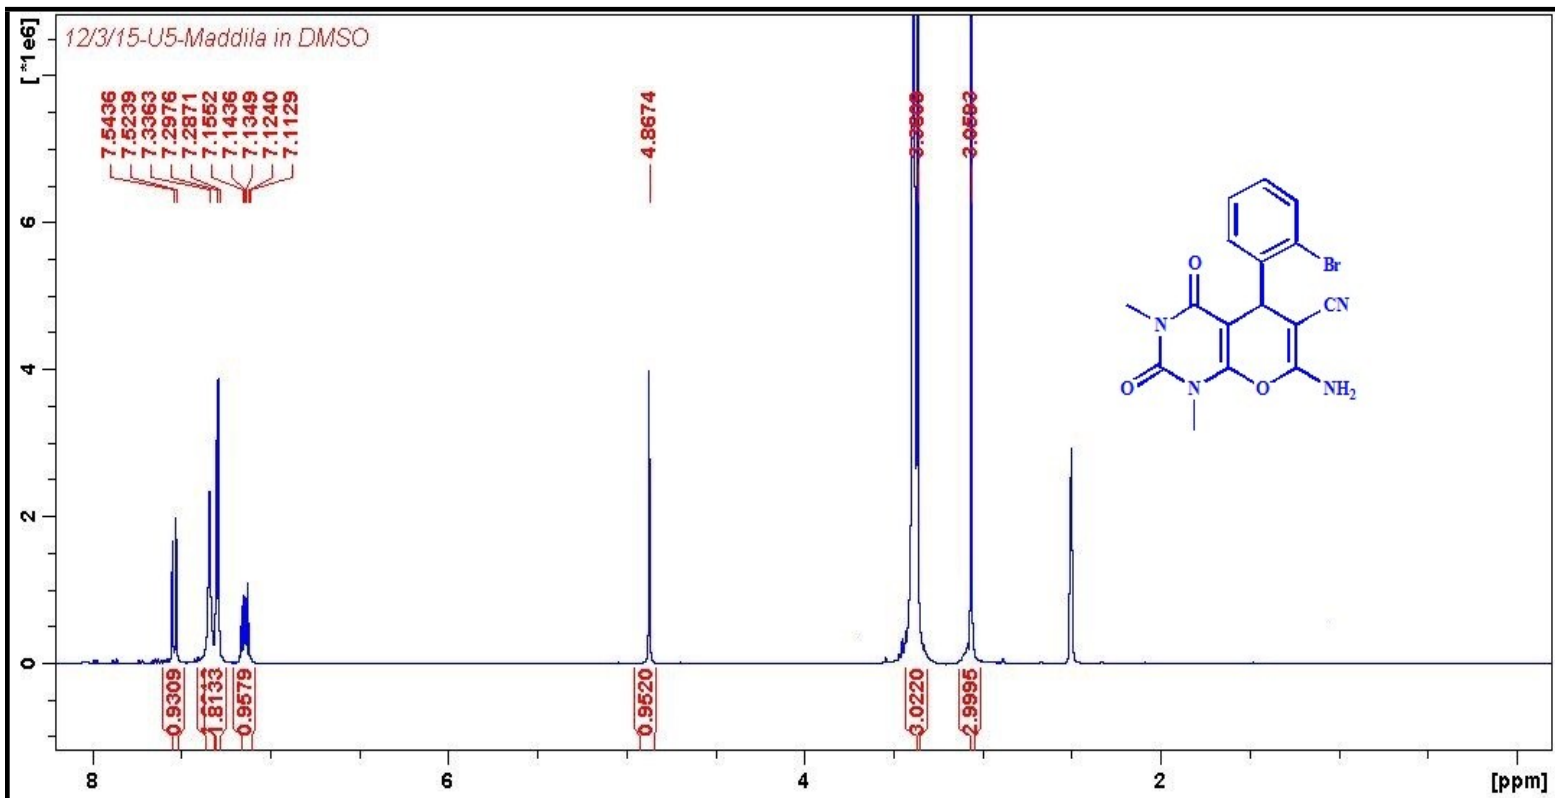

<sup>1</sup>H NMR spectra of compound 4d

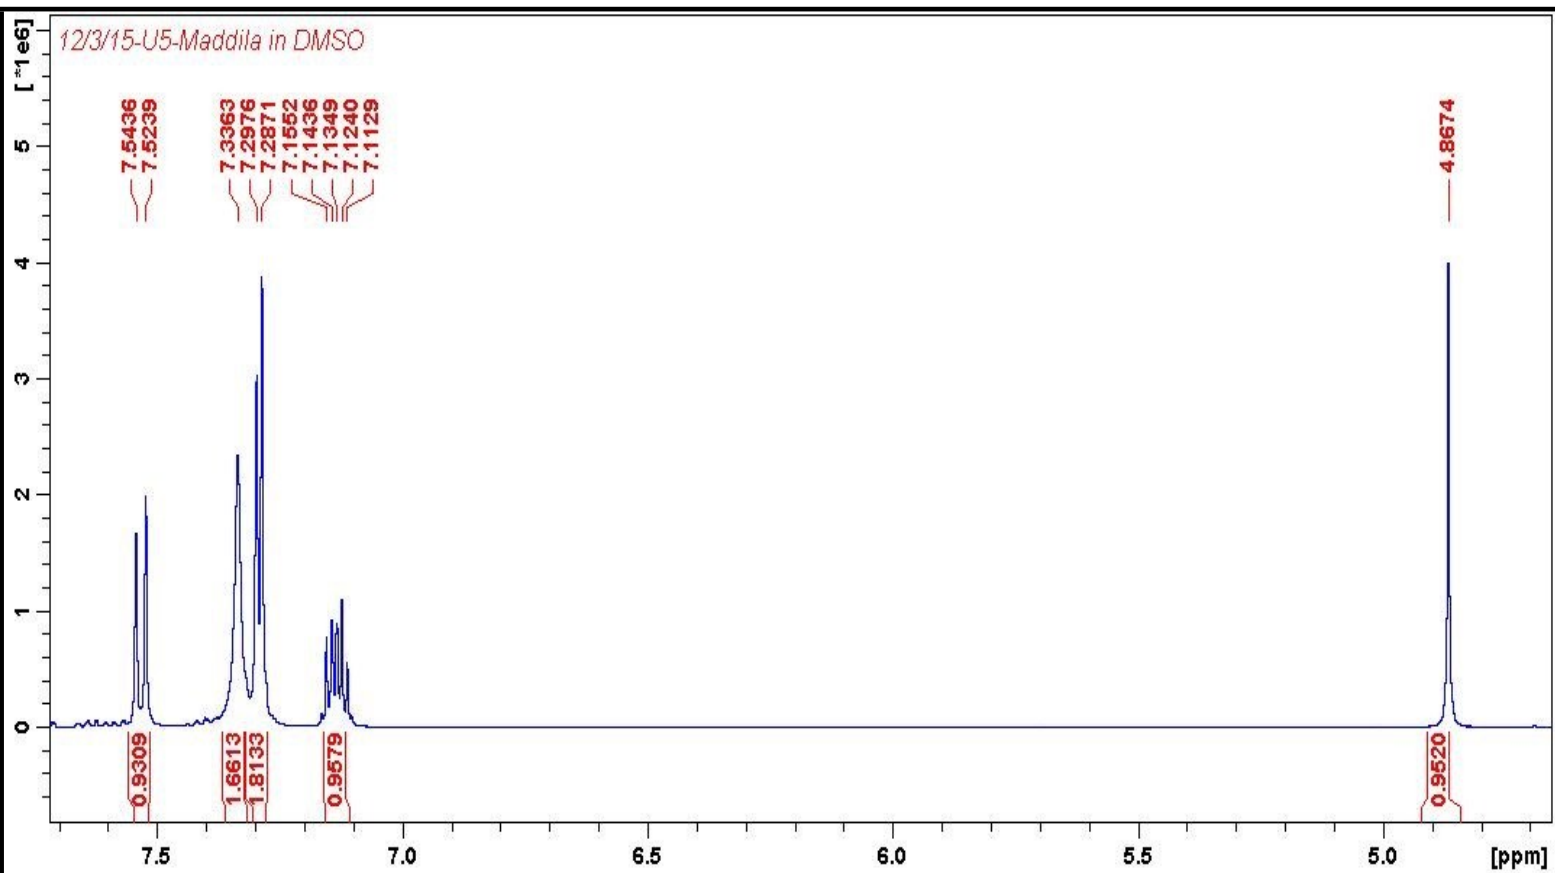

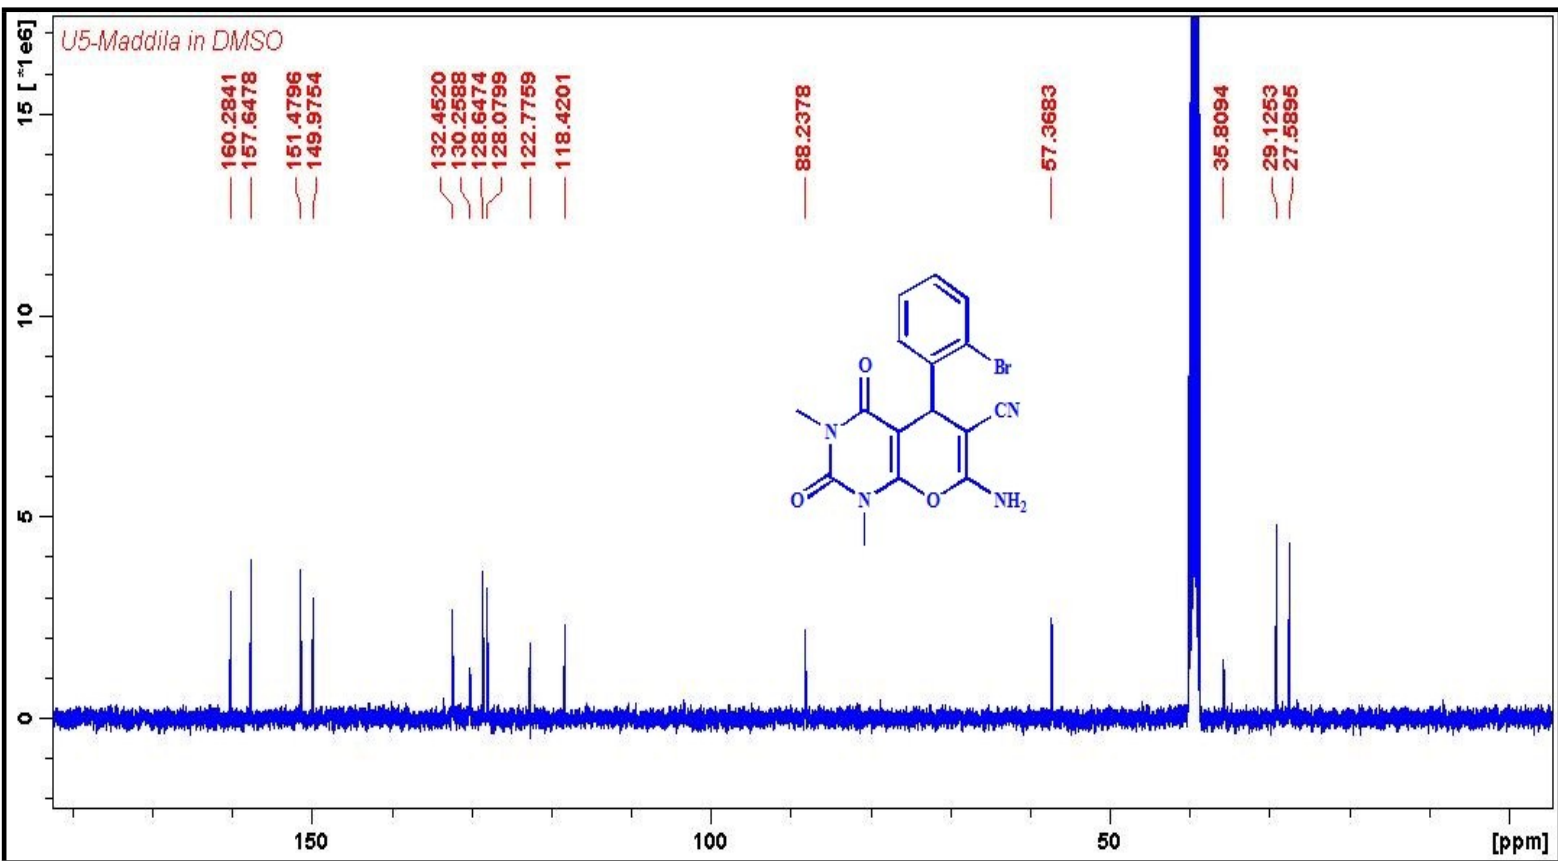

<sup>13</sup>C NMR spectra of compound 4d

<sup>15</sup>N NMR (GHSQC) spectra of compound 4d

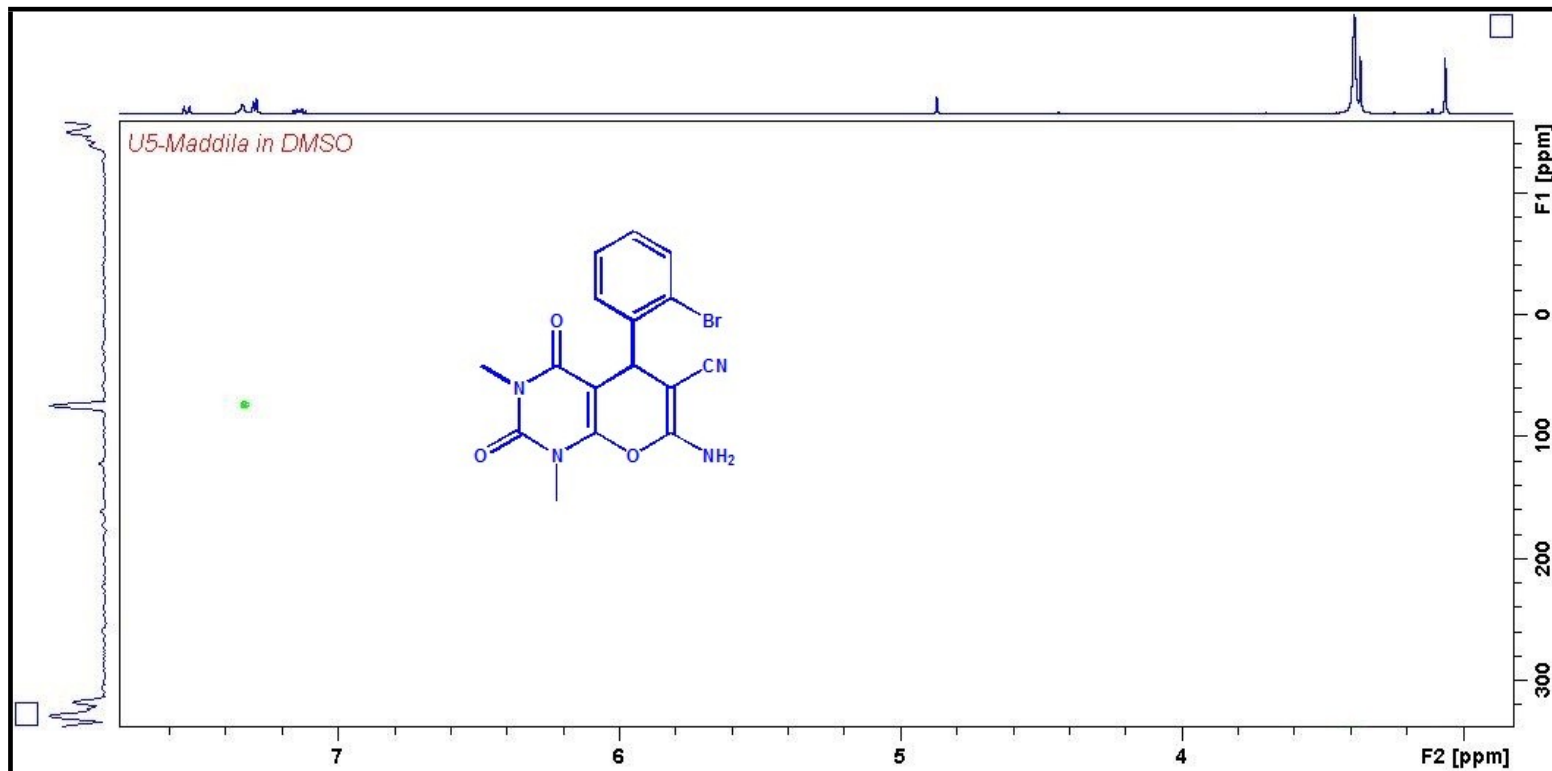

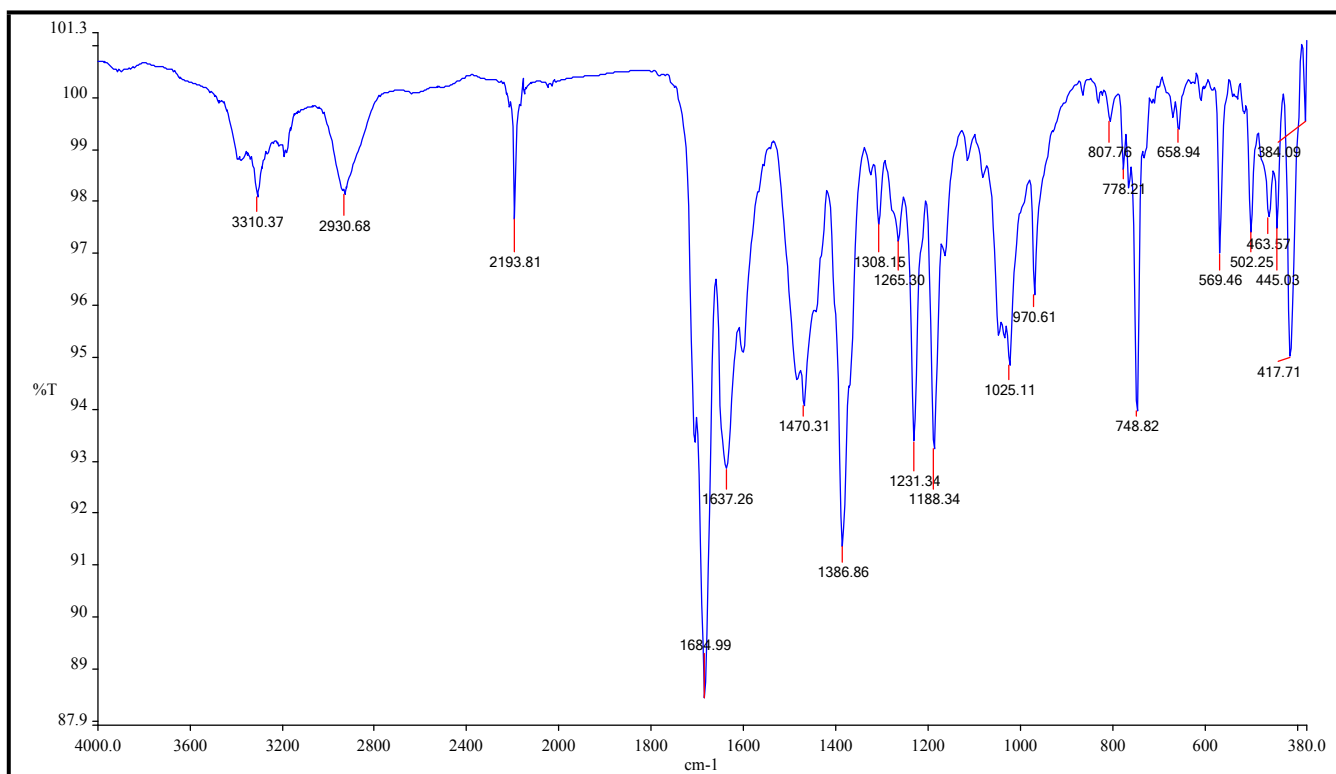

**FT-IR spectra of compound 4d**

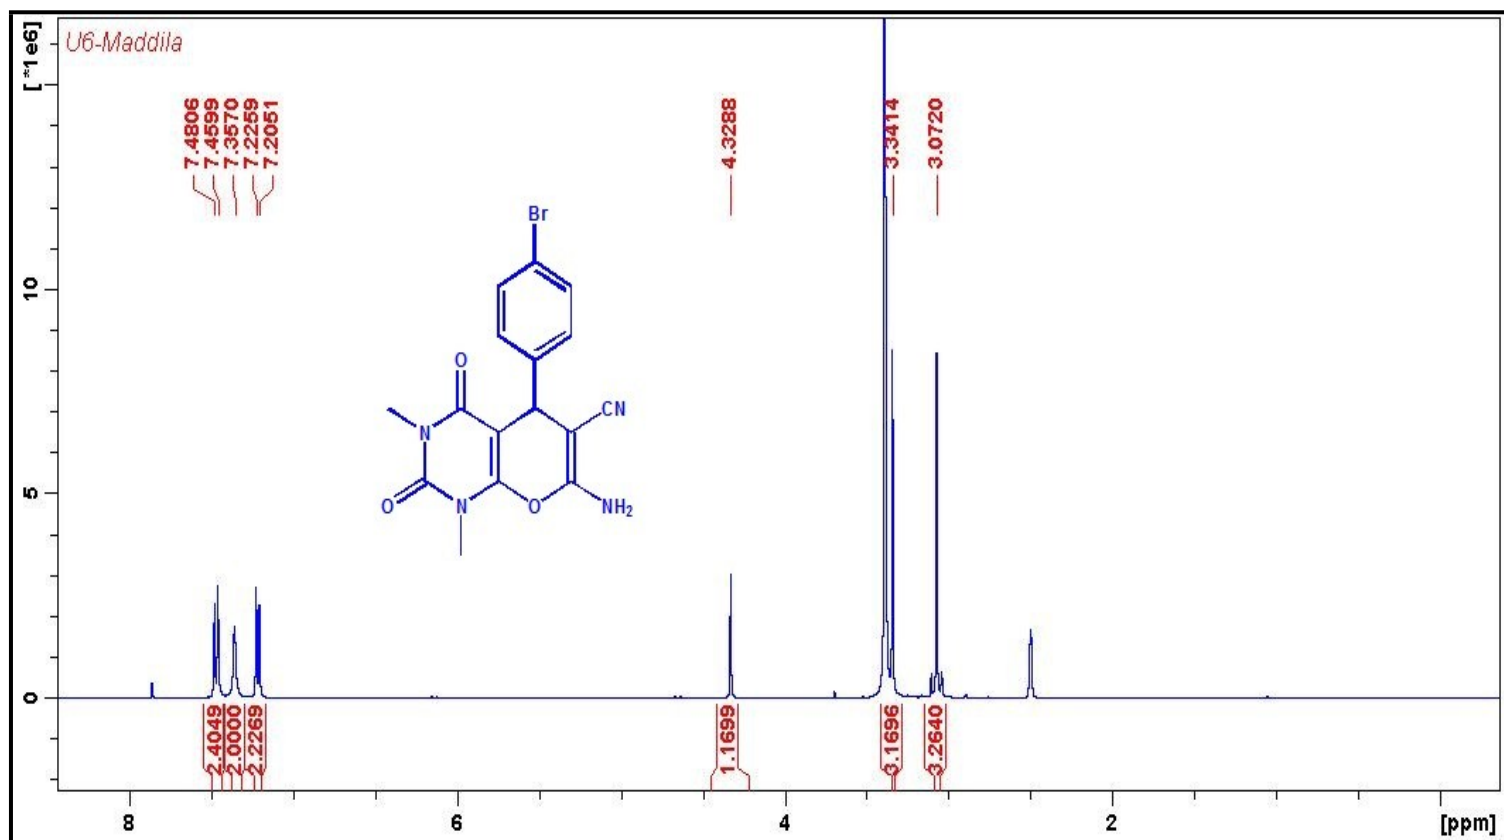

<sup>1</sup>H NMR spectra of compound 4e

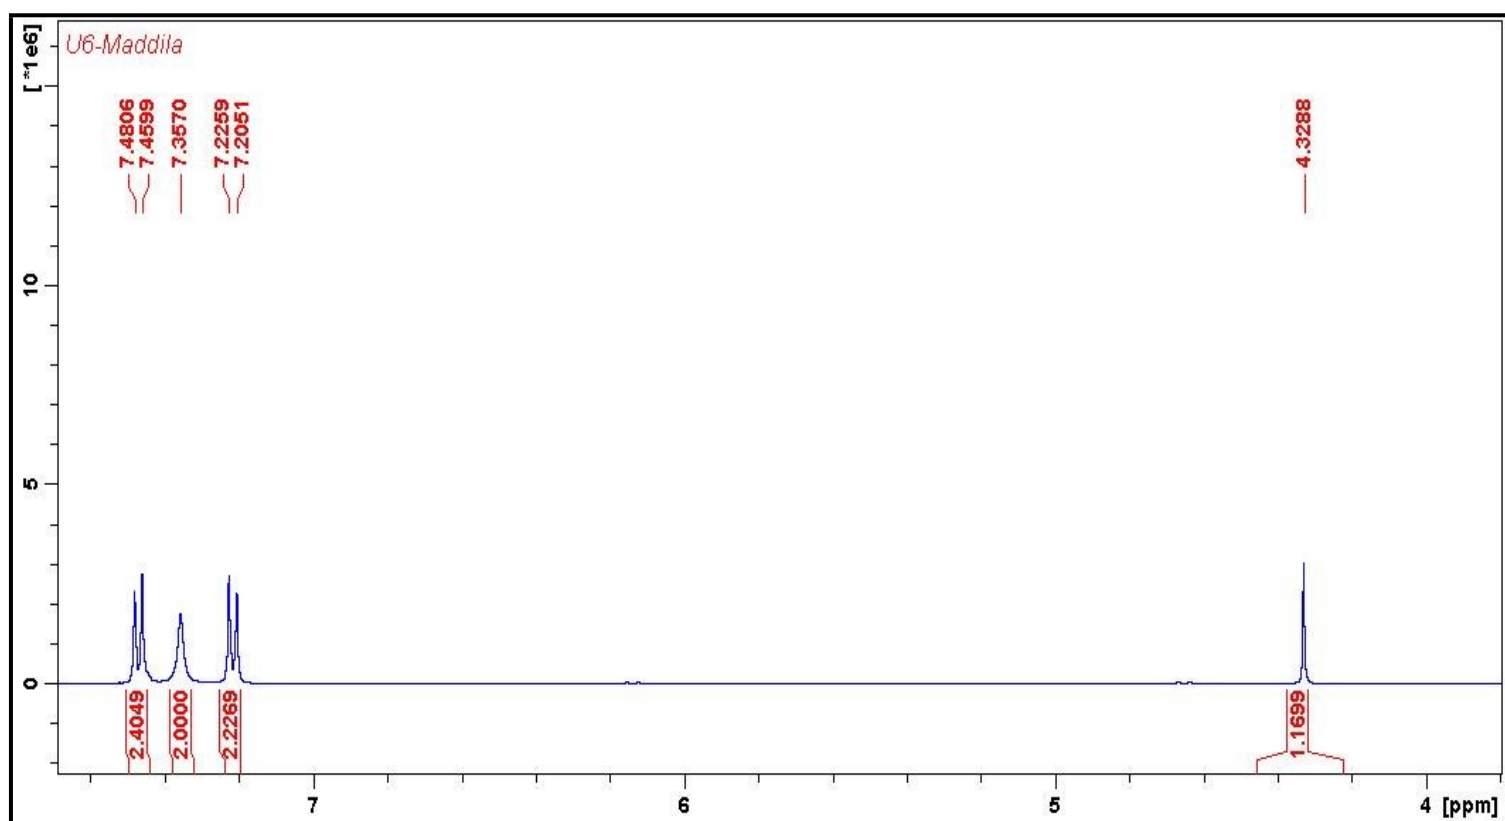

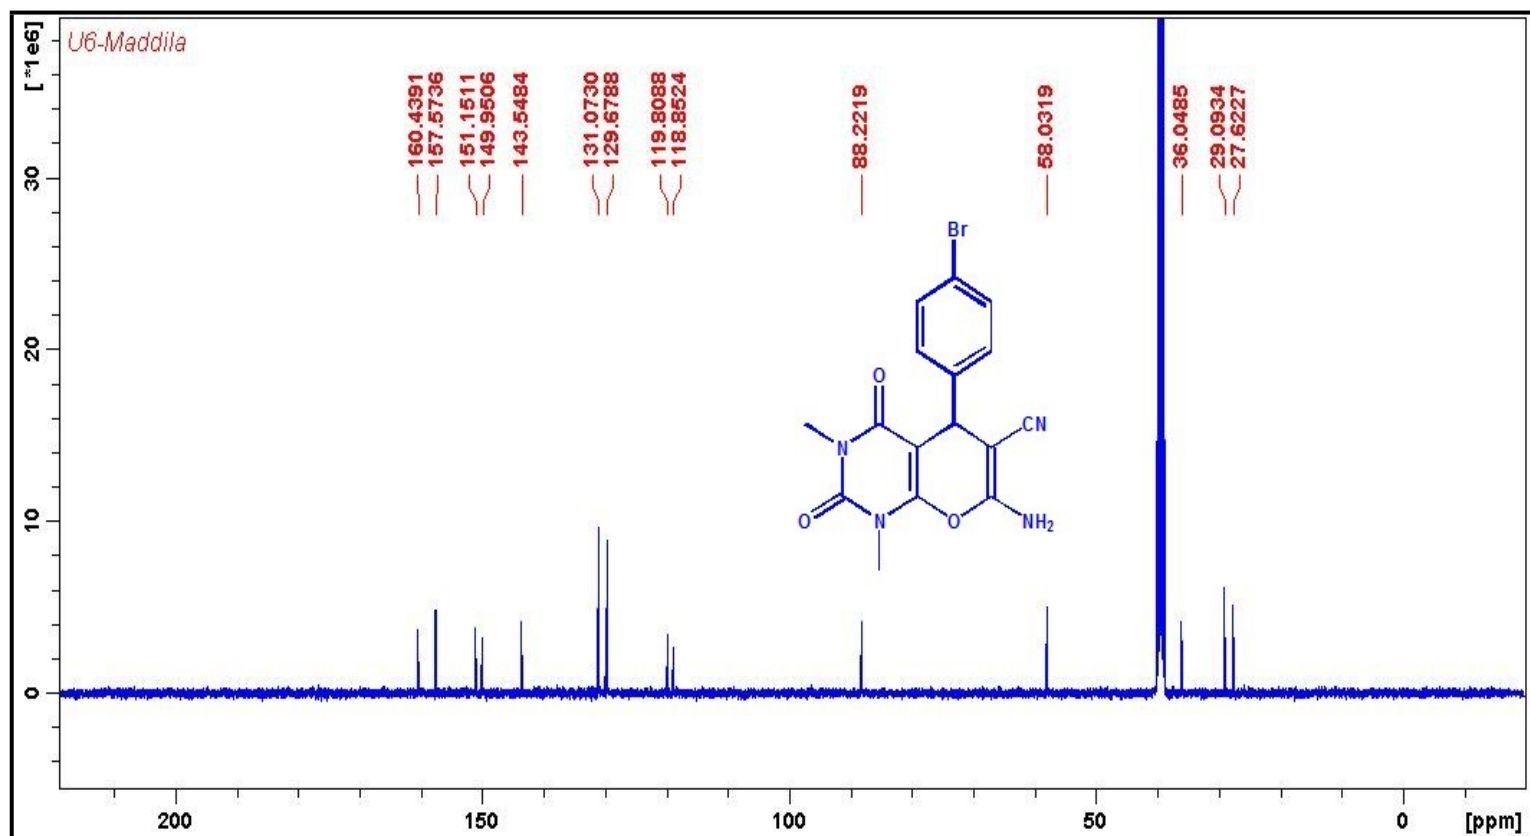

<sup>13</sup>C NMR spectra of compound 4e

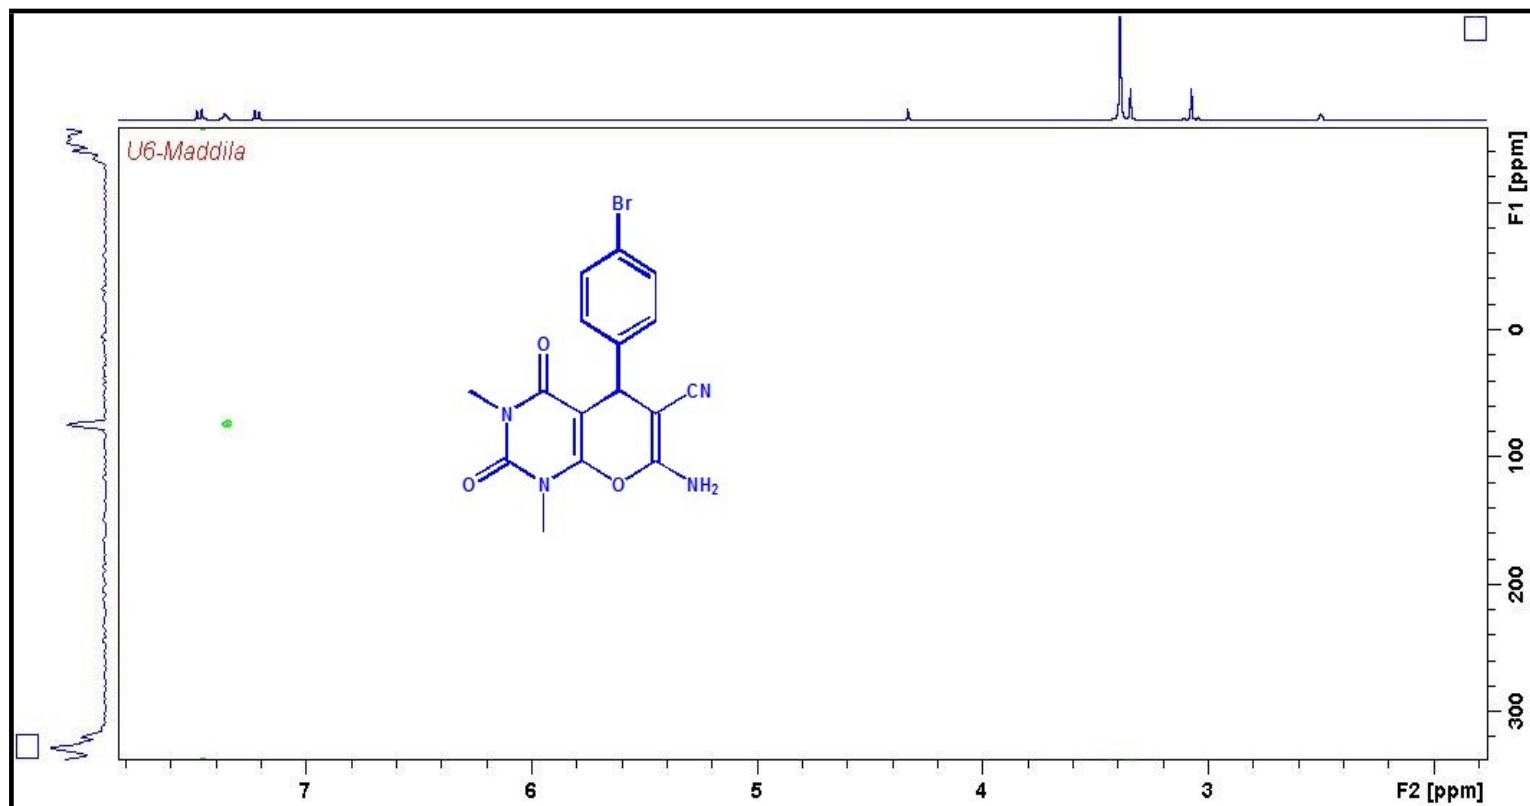

<sup>15</sup>N NMR (GHSQC) spectra of compound 4e



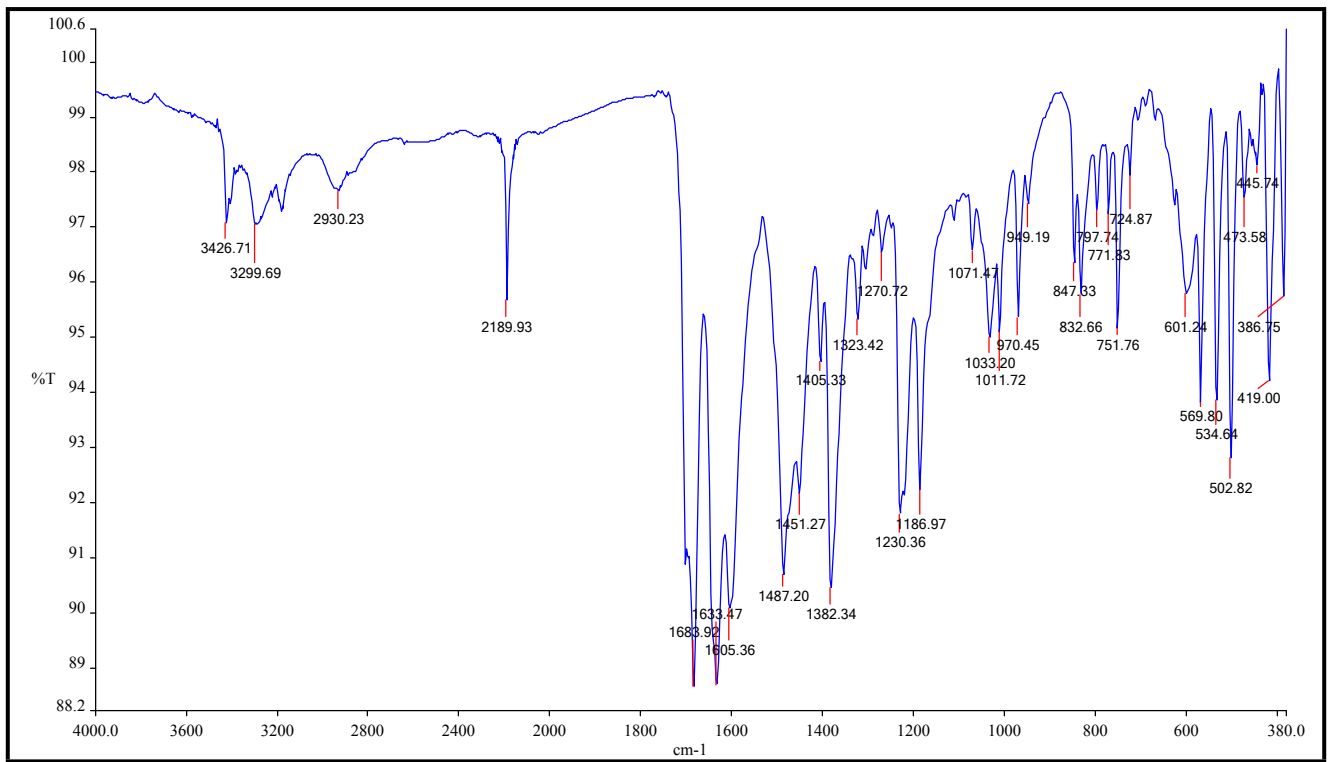

**FT-IR spectra of compound 4e**

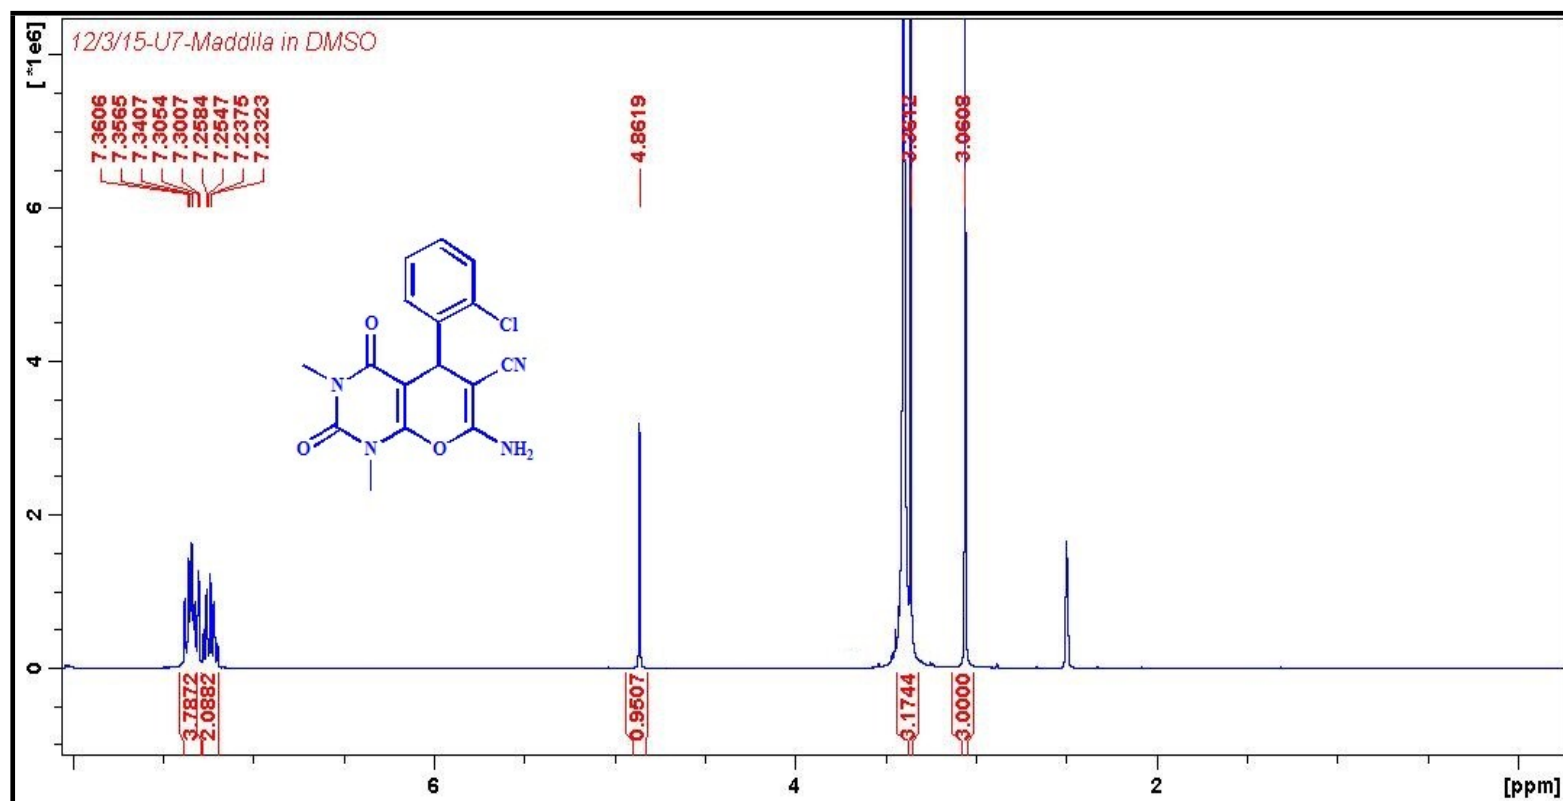

<sup>1</sup>H NMR spectra of compound 4f

<sup>13</sup>C NMR spectra of compound 4f

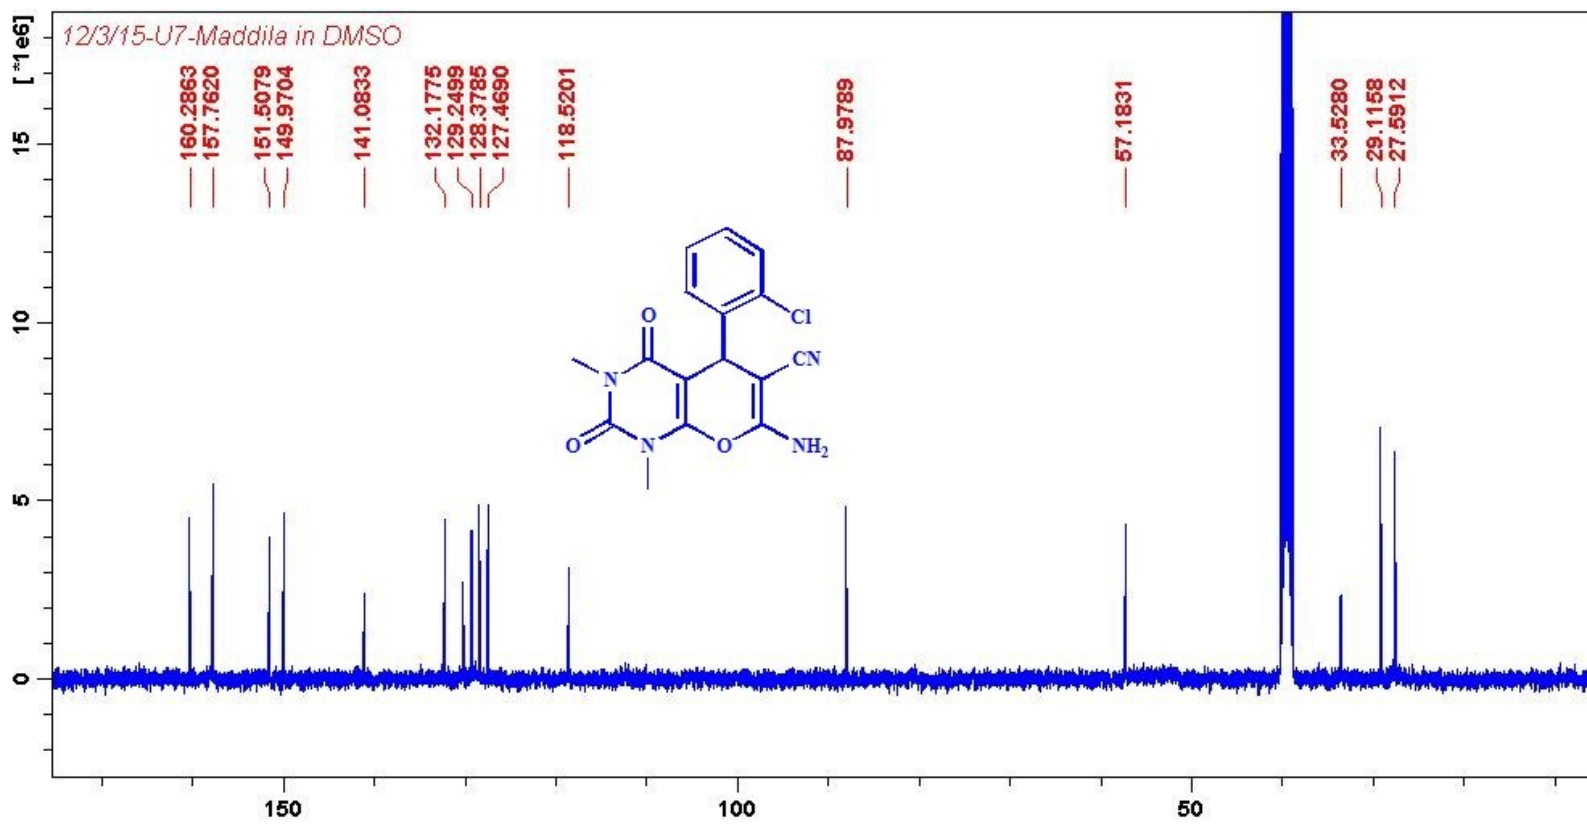

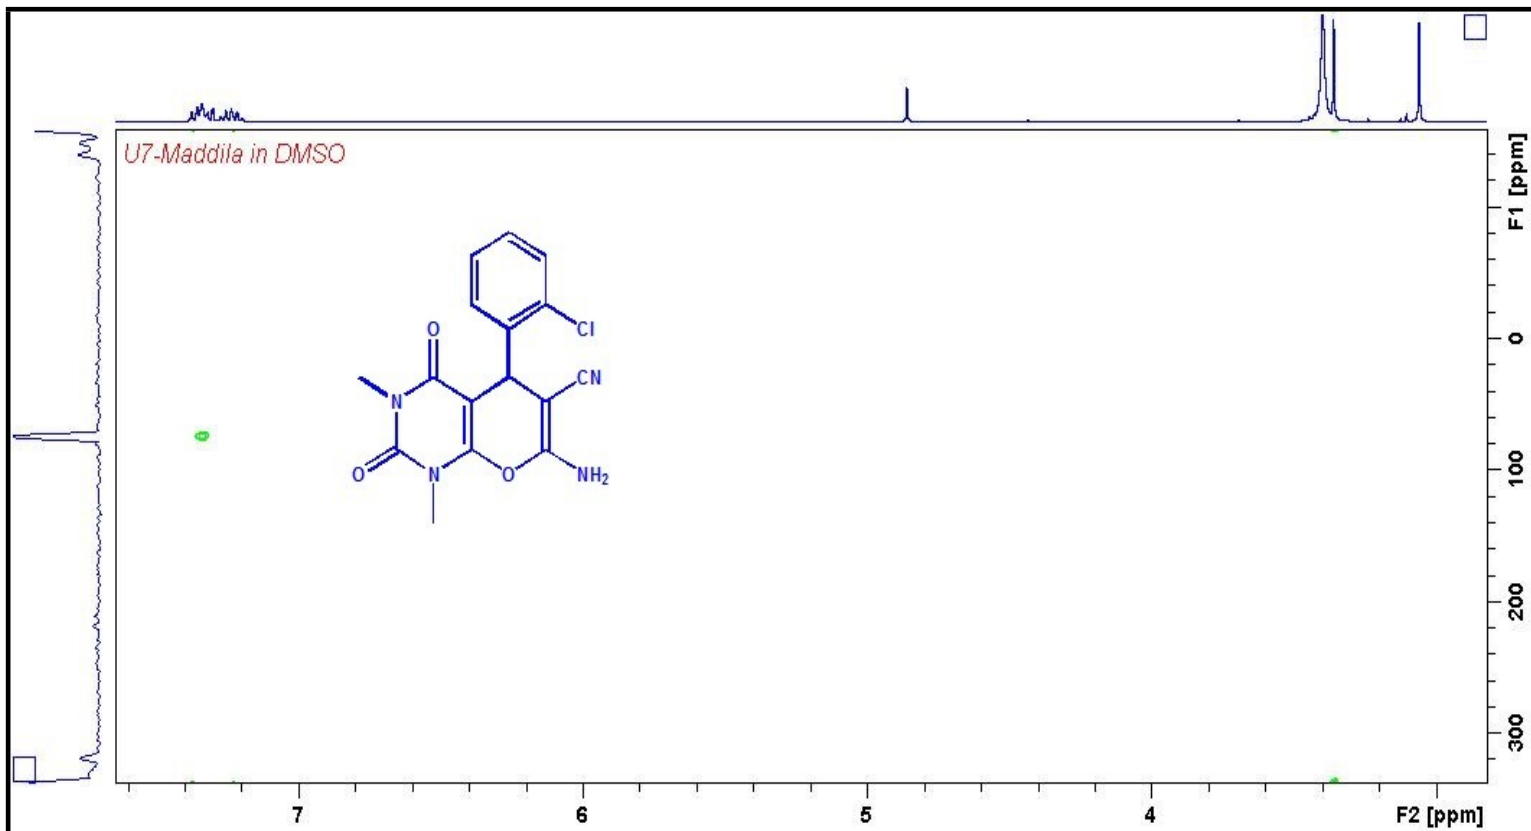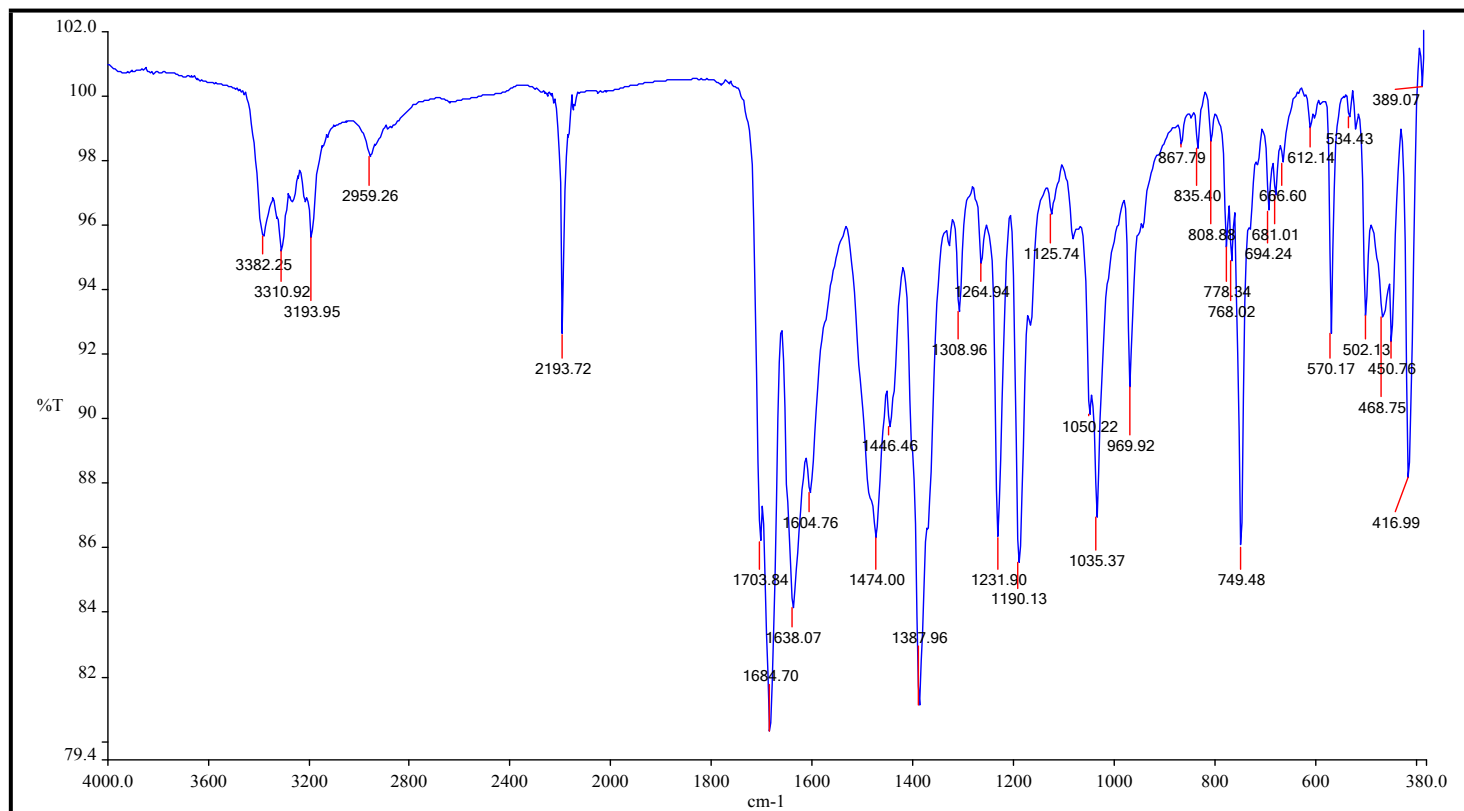

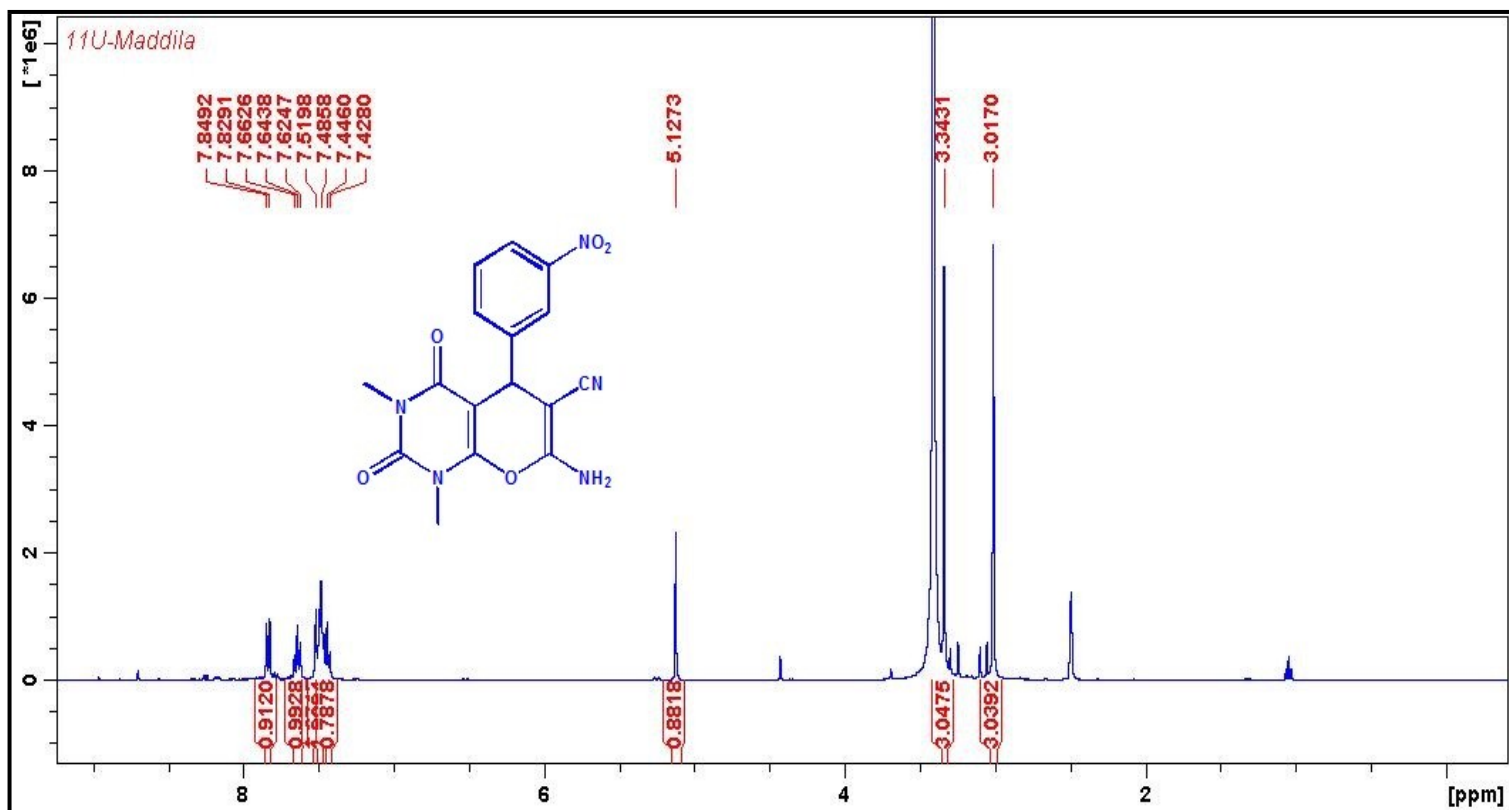

<sup>1</sup>H NMR spectra of compound 4g

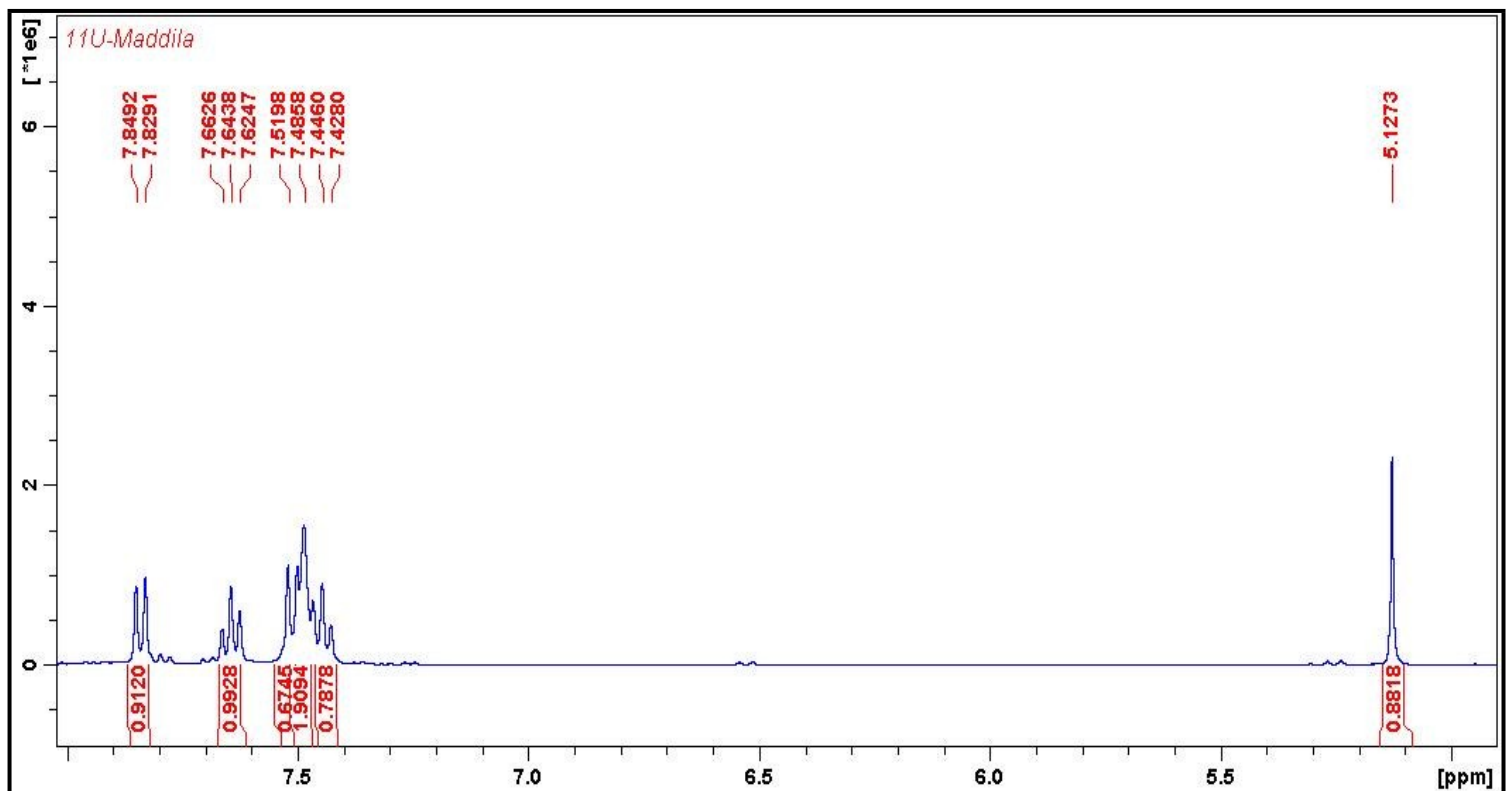

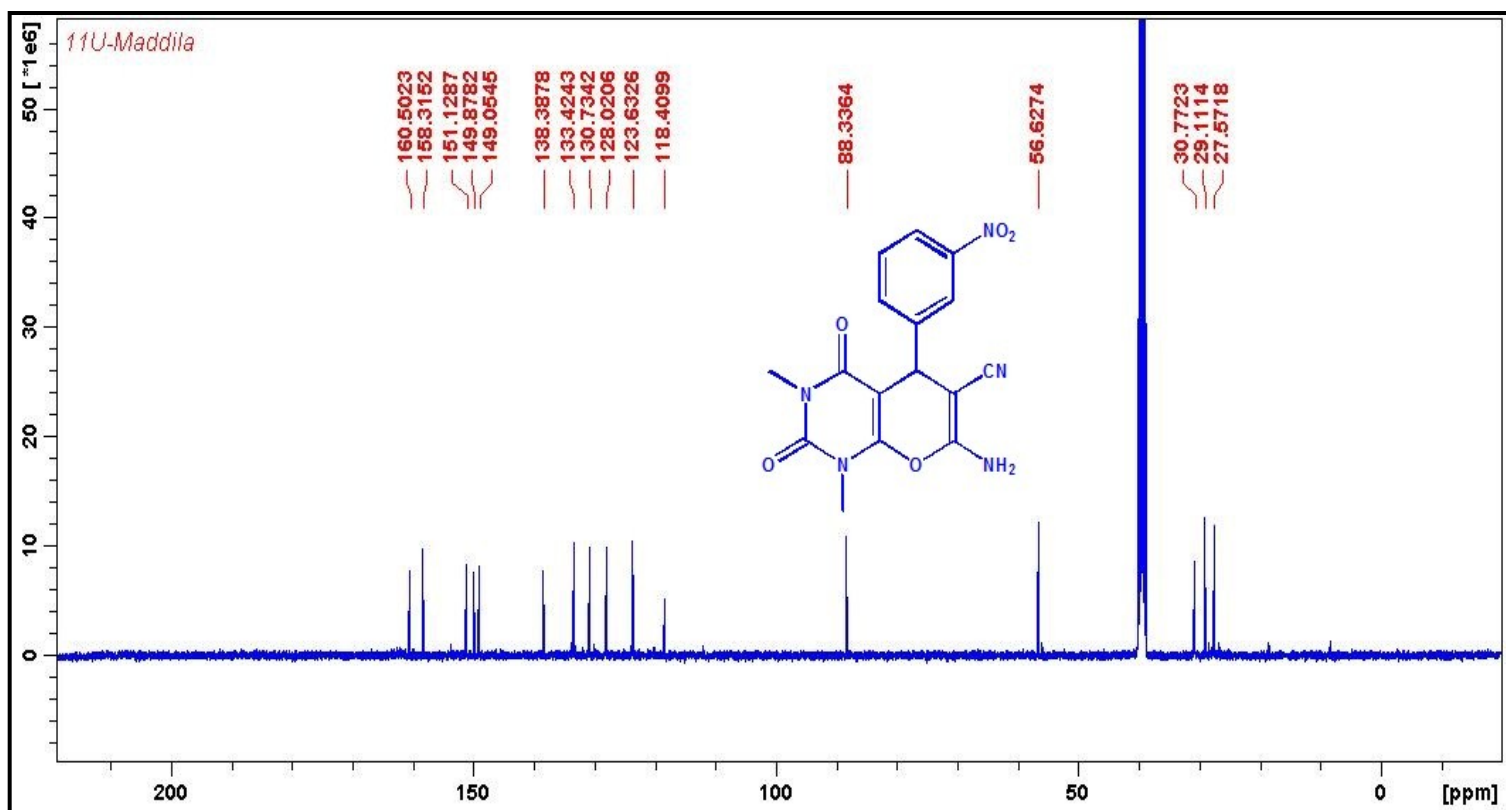

<sup>13</sup>C NMR spectra of compound 4g

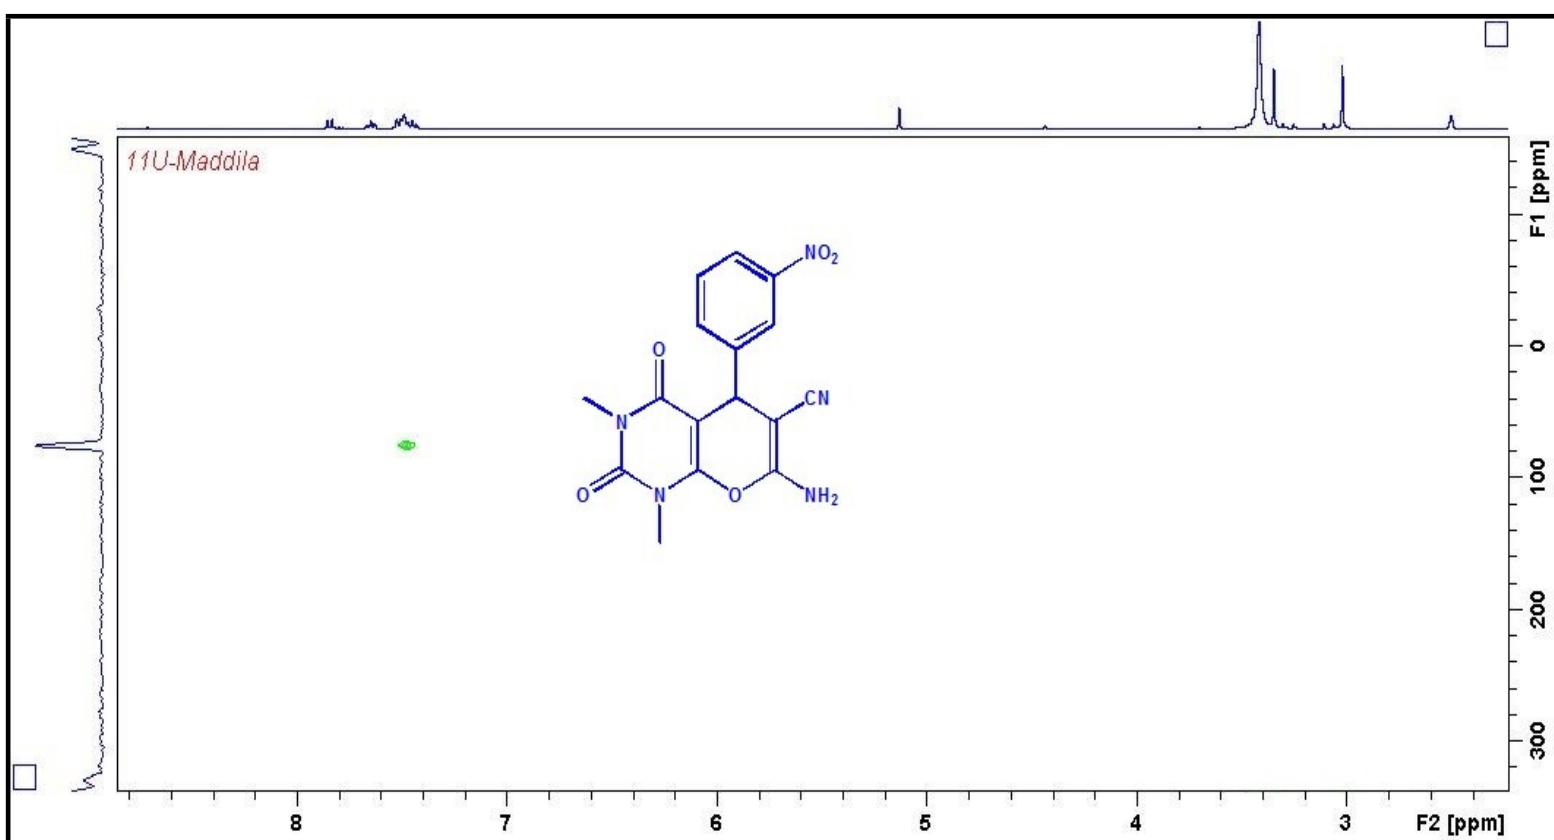

<sup>15</sup>N NMR (GHSQC) spectra of compound 4g

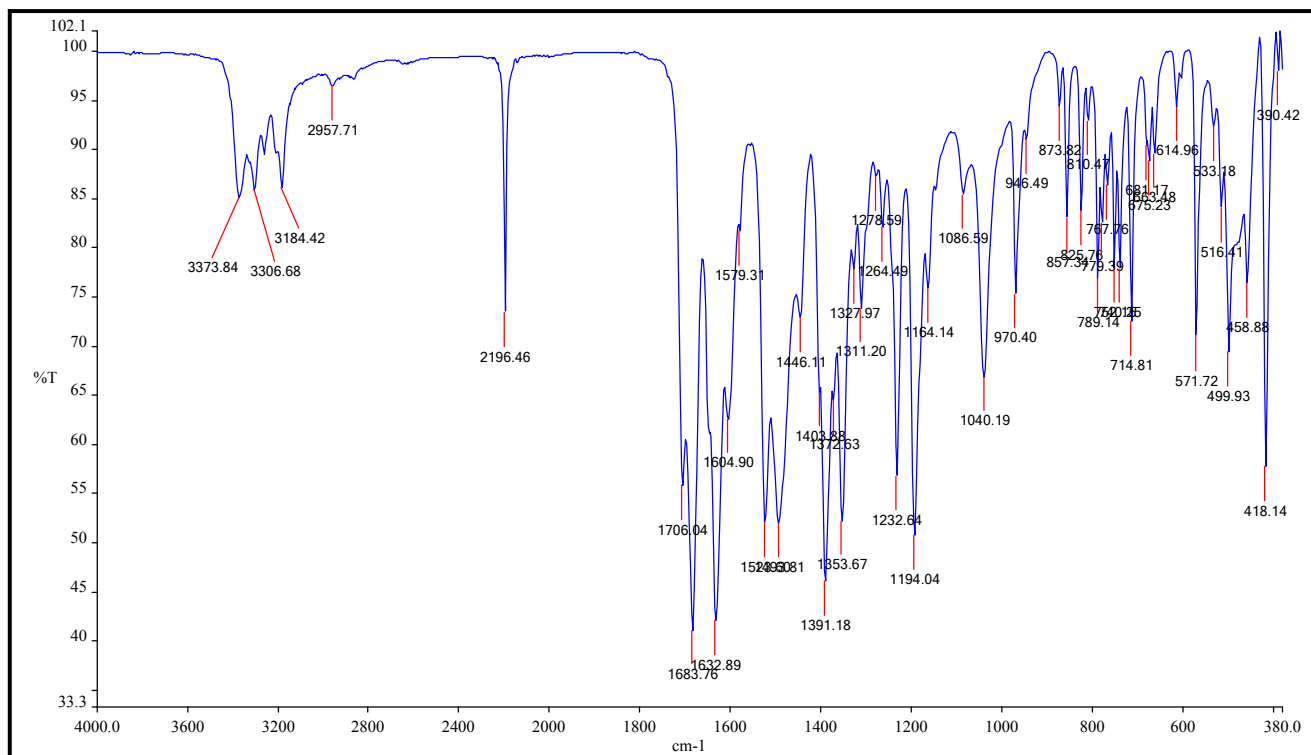

**FT-IR spectra of compound 4g**

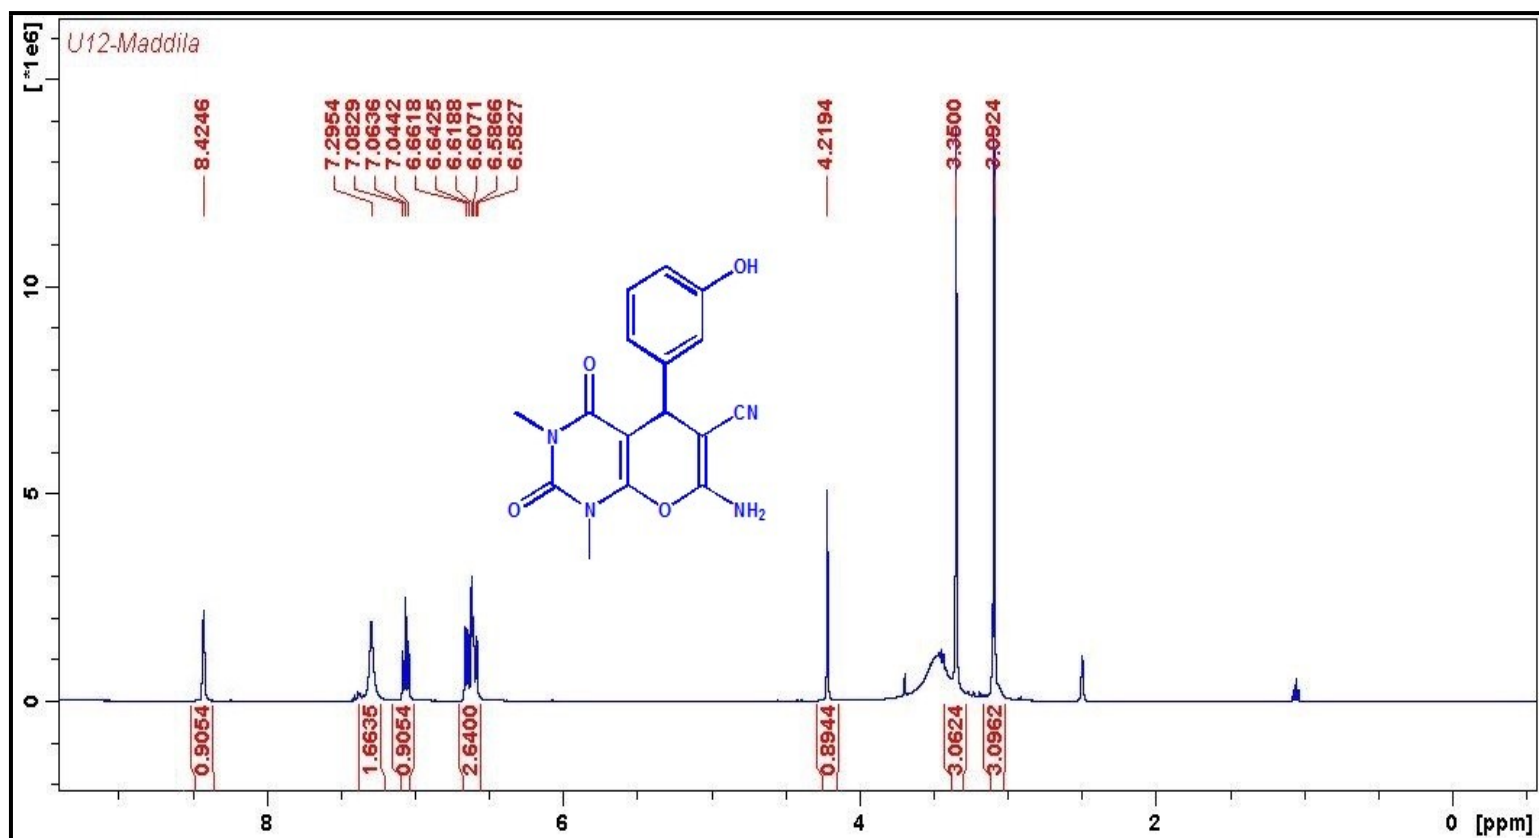

<sup>1</sup>H NMR spectra of compound 4h

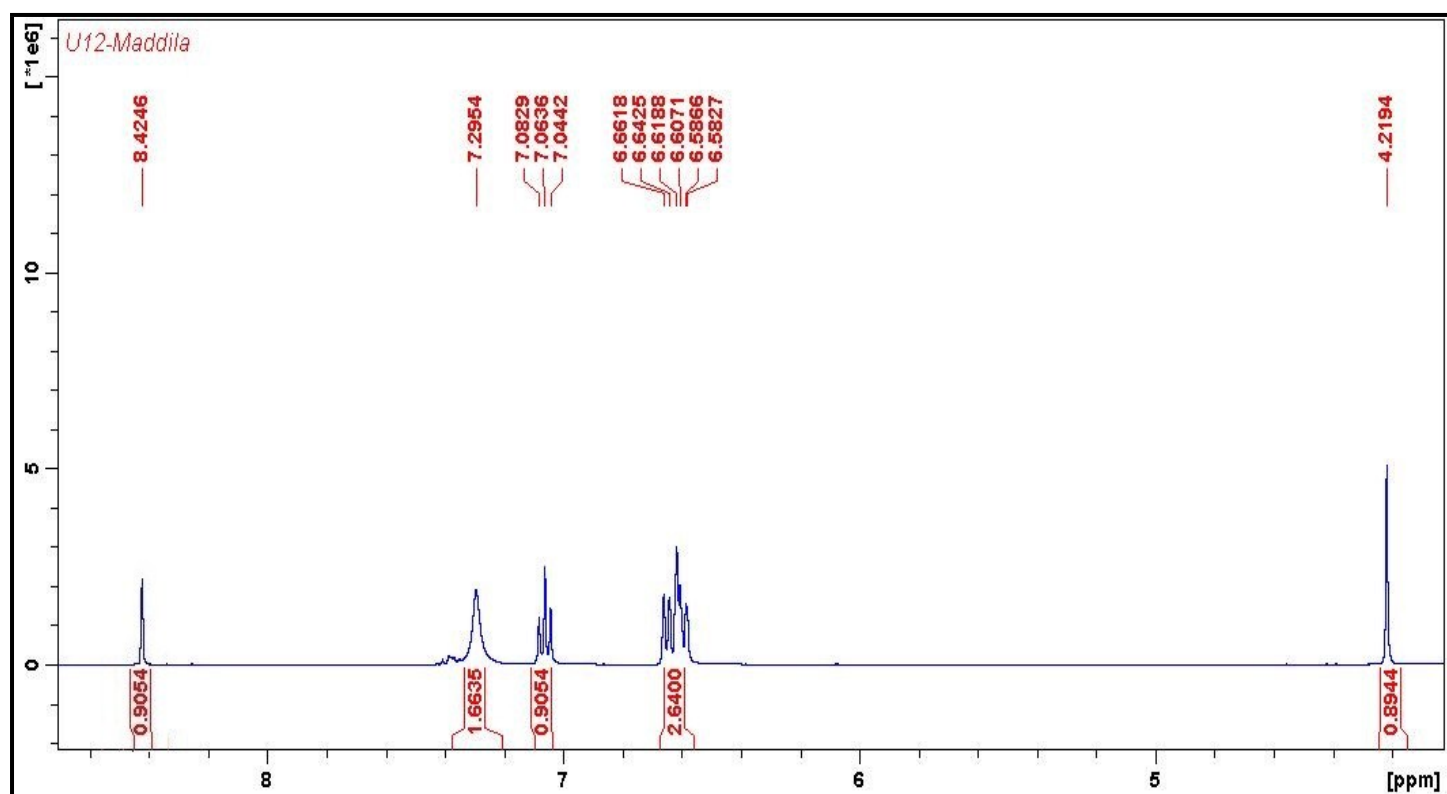

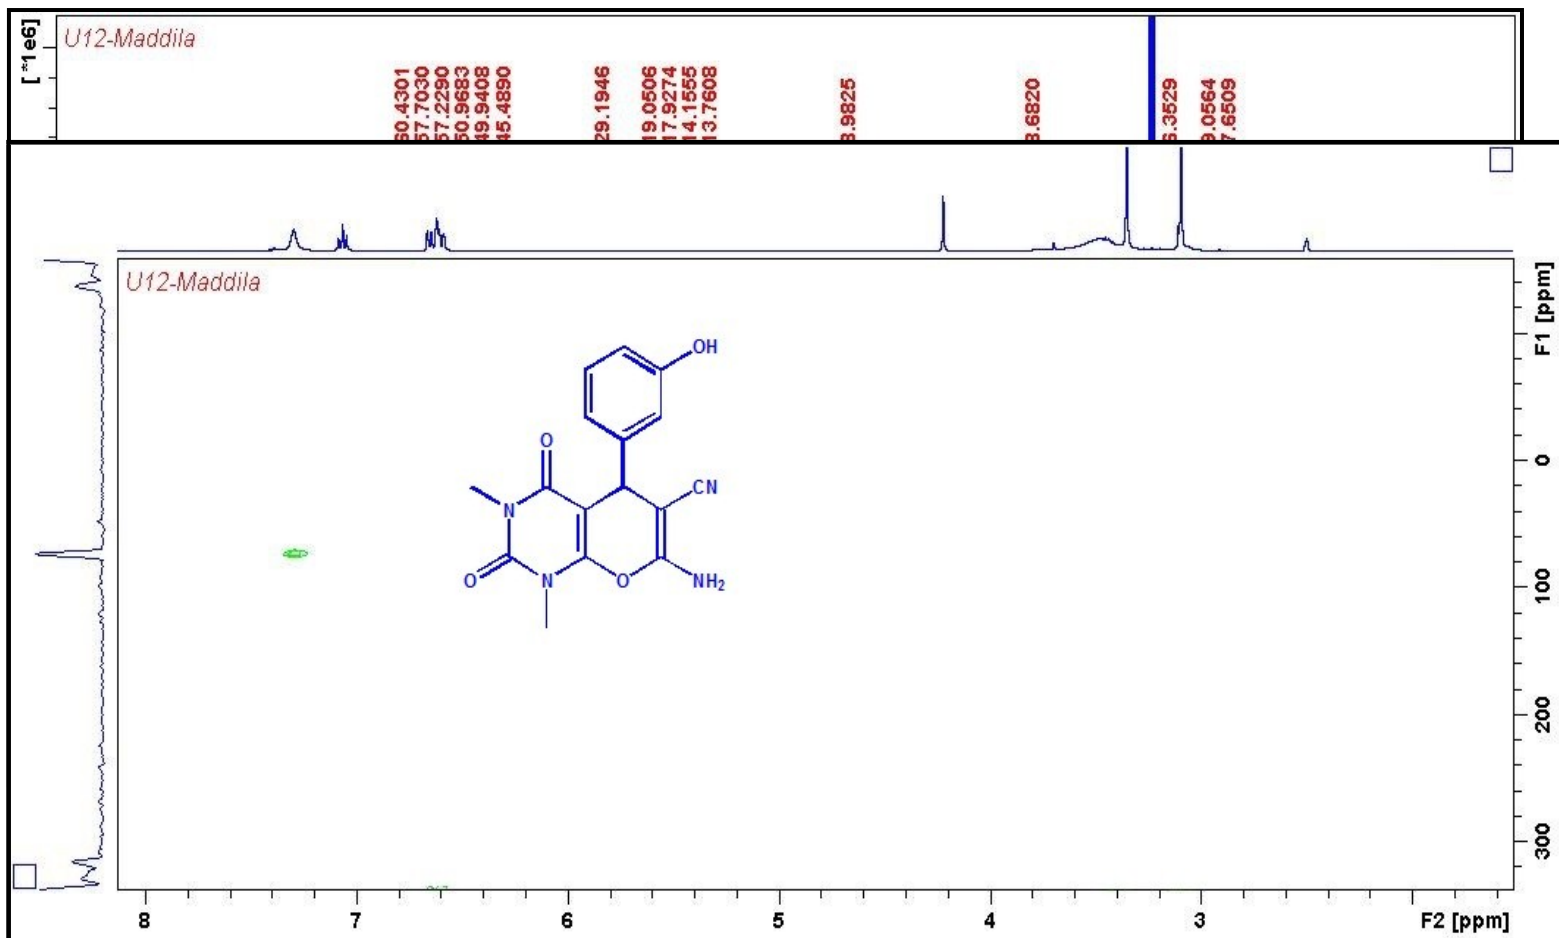

<sup>13</sup>C NMR spectra of compound 4h

<sup>15</sup>N NMR (GHSQC) spectra of compound 4h



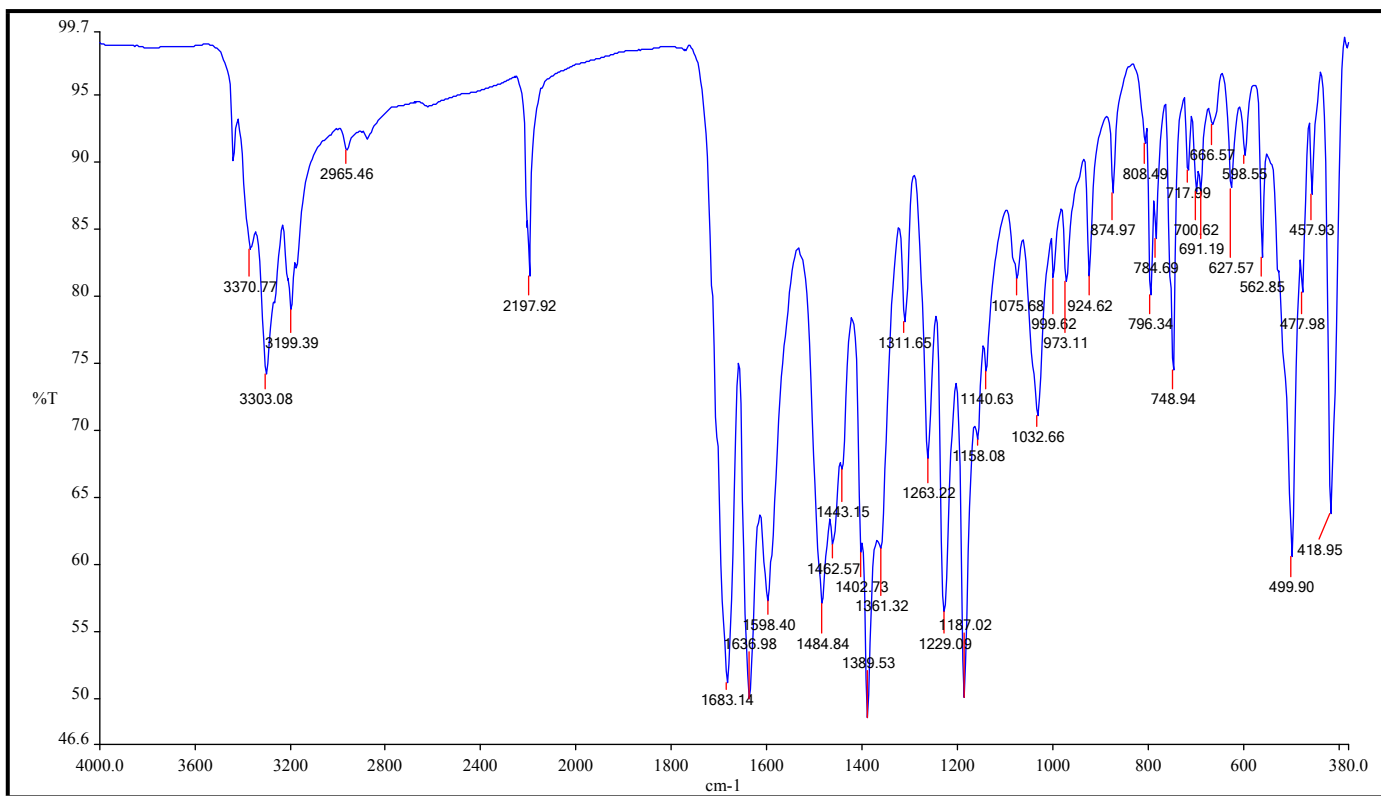

**FT-IR spectra of compound 4h**

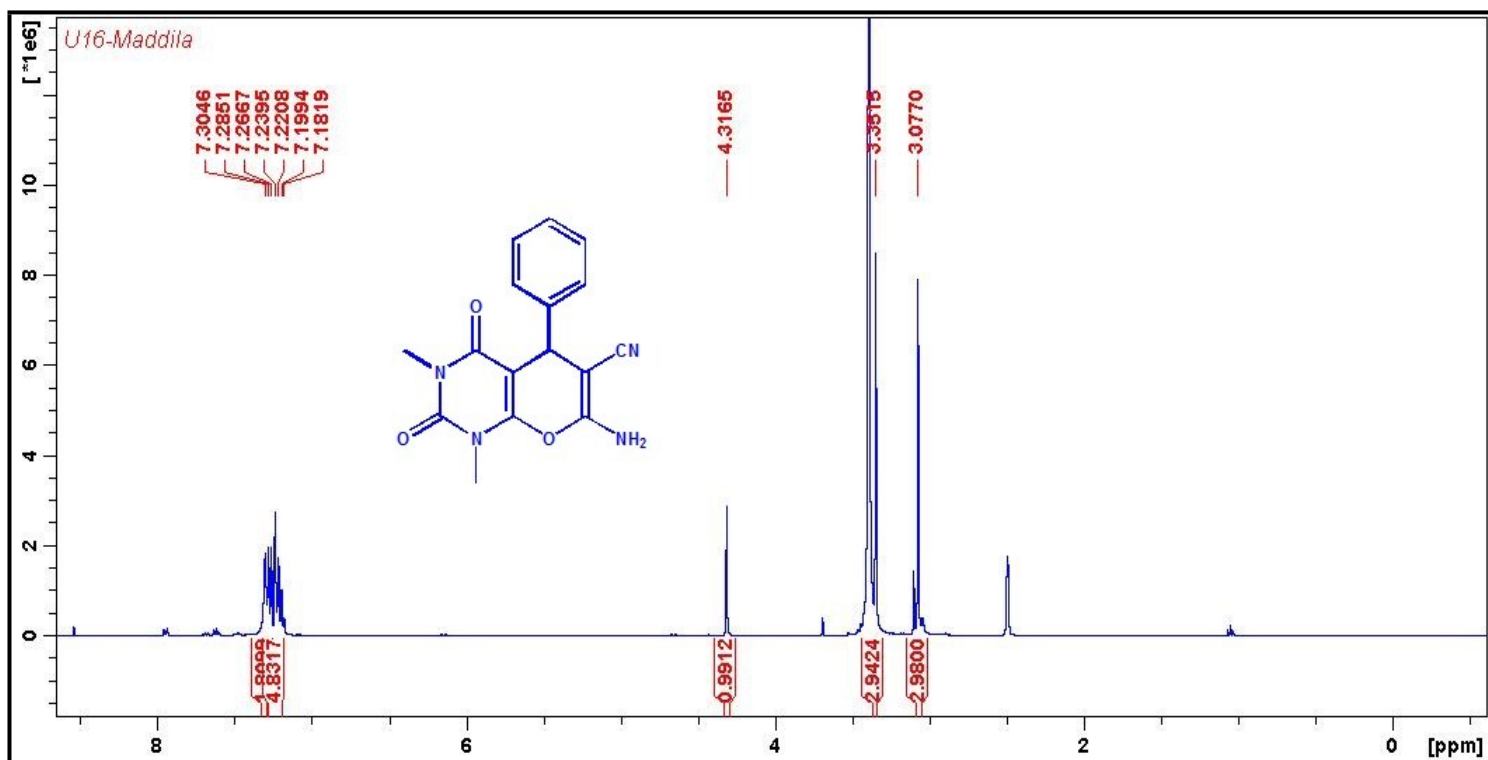

<sup>1</sup>H NMR spectra of compound 4i

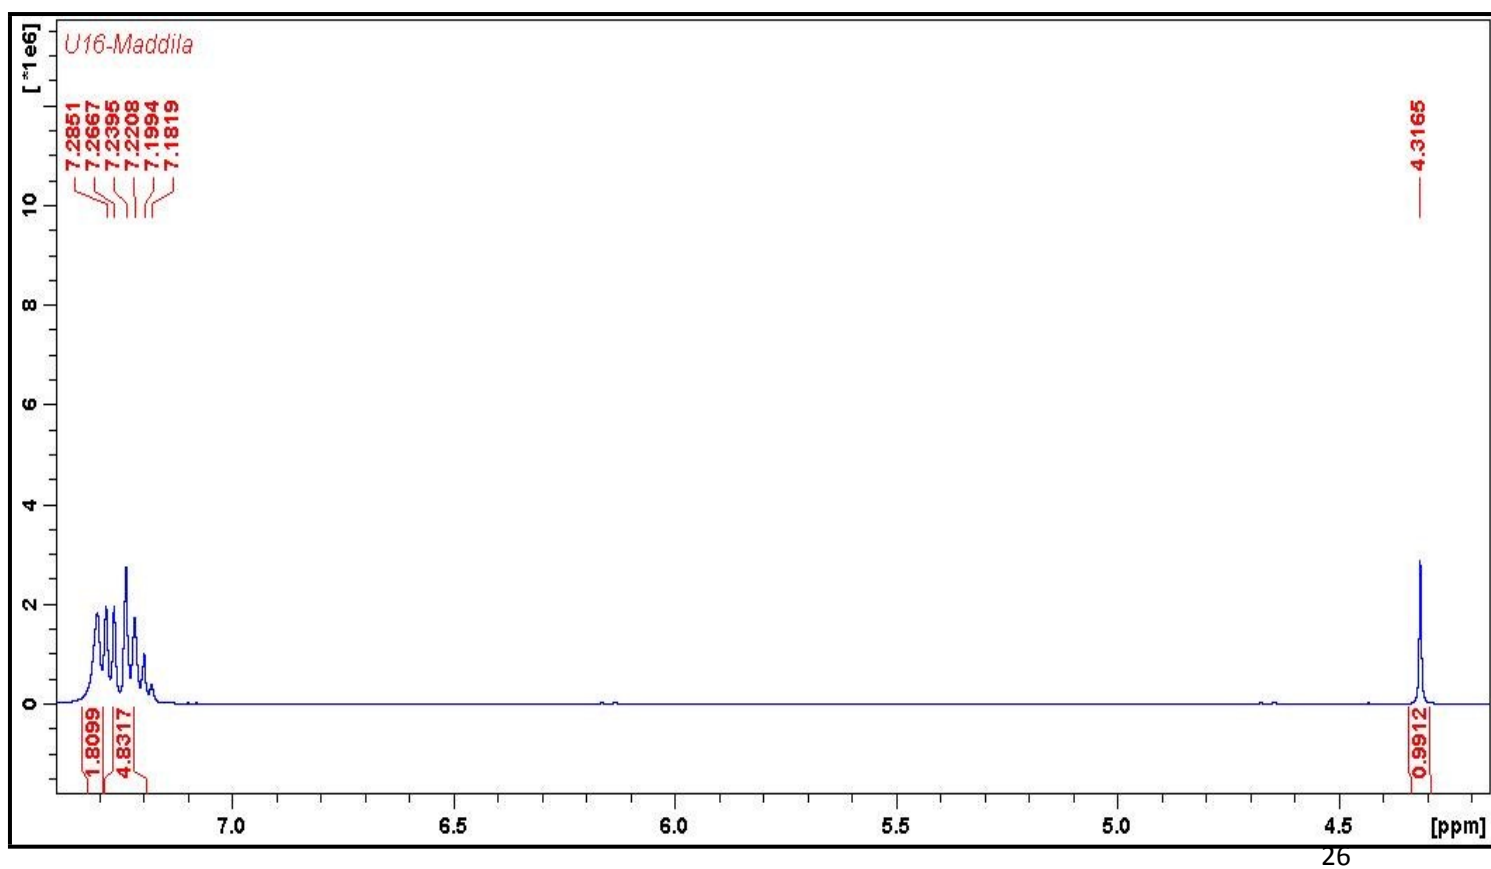

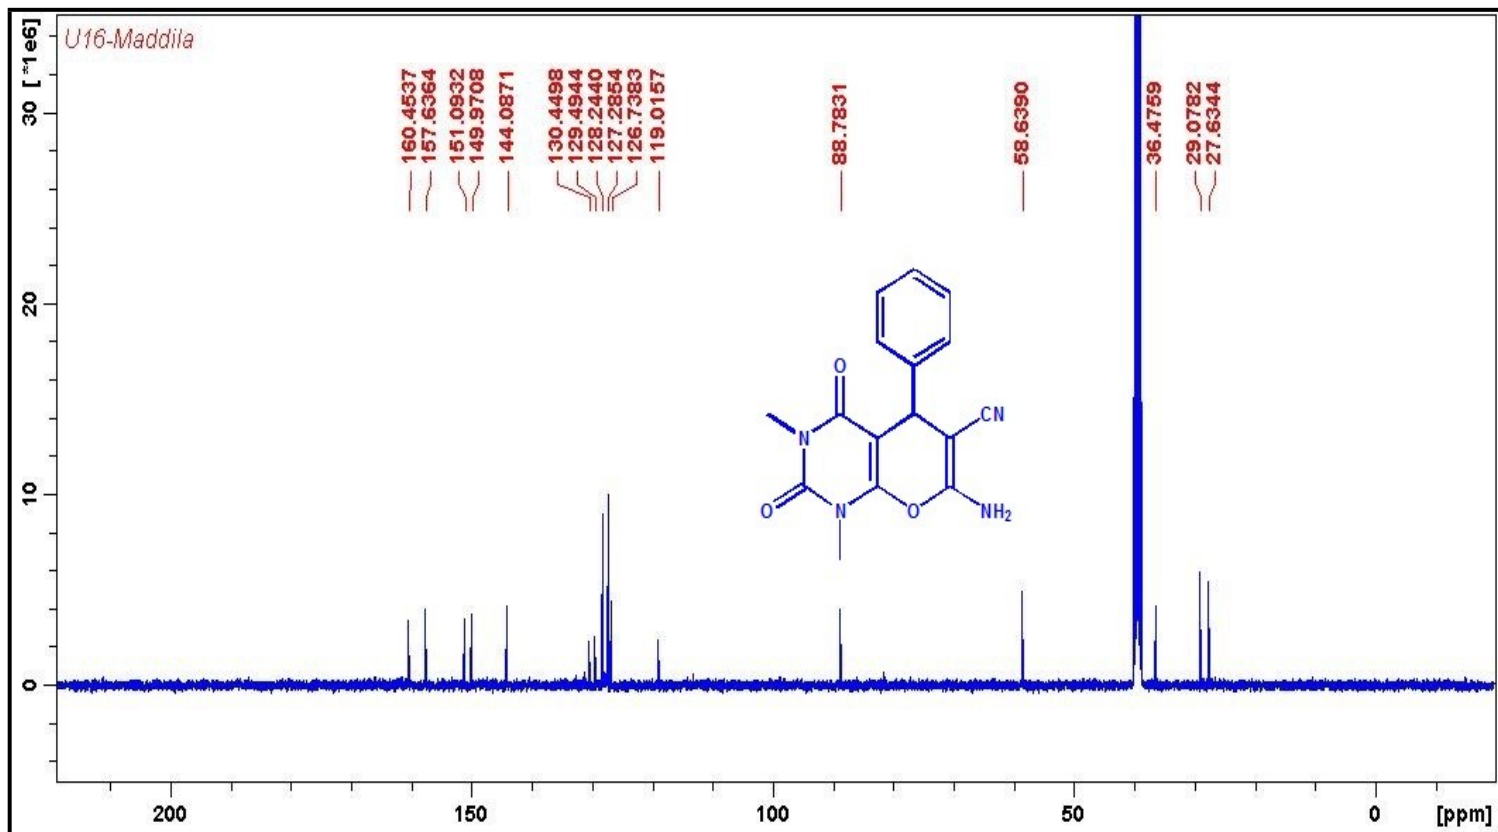

<sup>13</sup>C NMR spectra of compound 4i

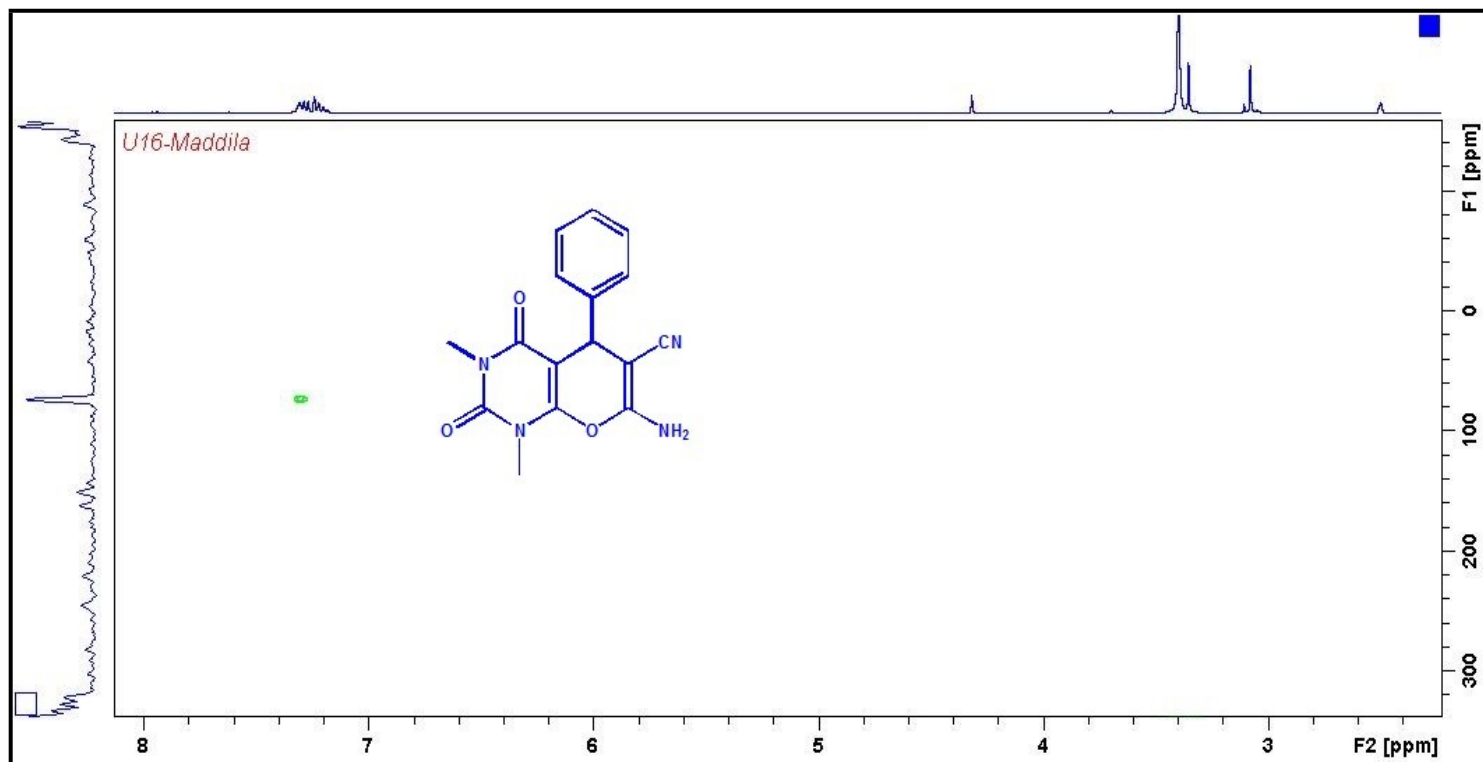

<sup>15</sup>N NMR (GHSQC) spectra of compound 4i

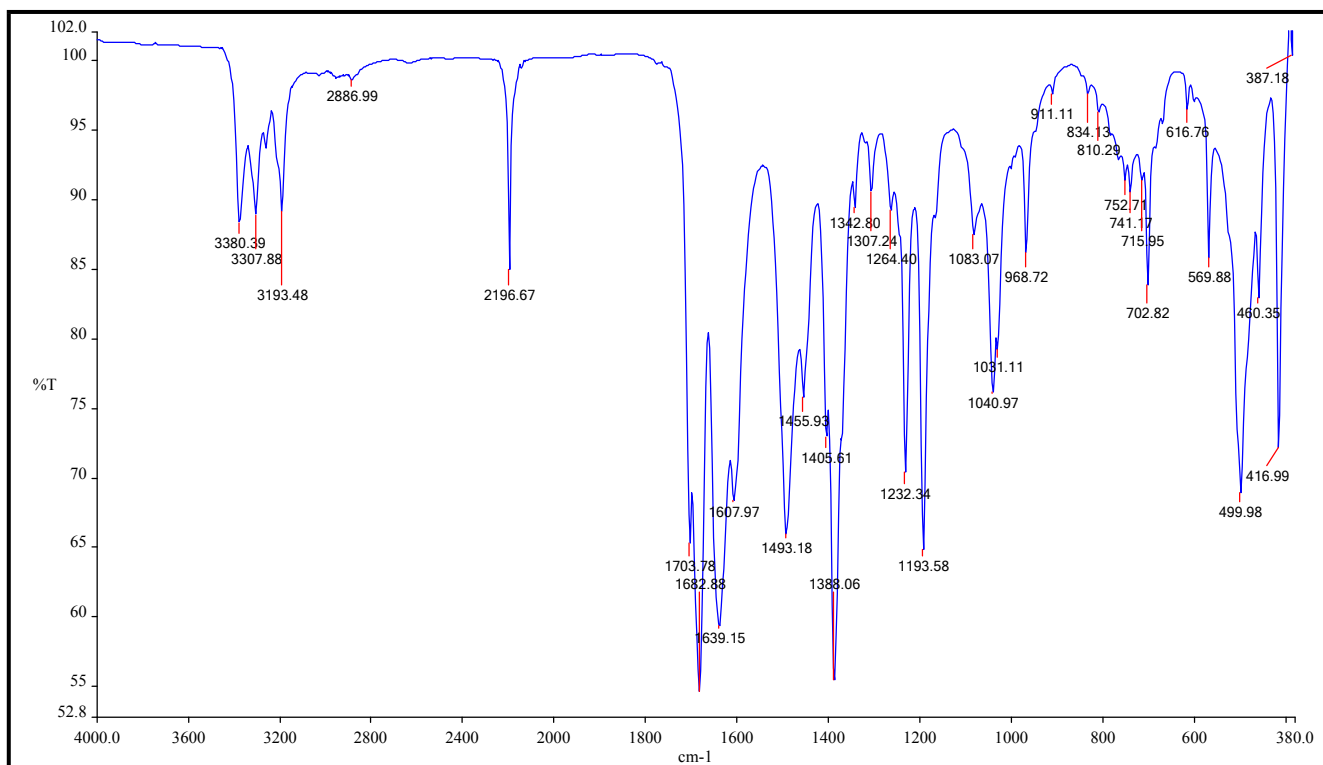

**FT-IR spectra of compound 4i**

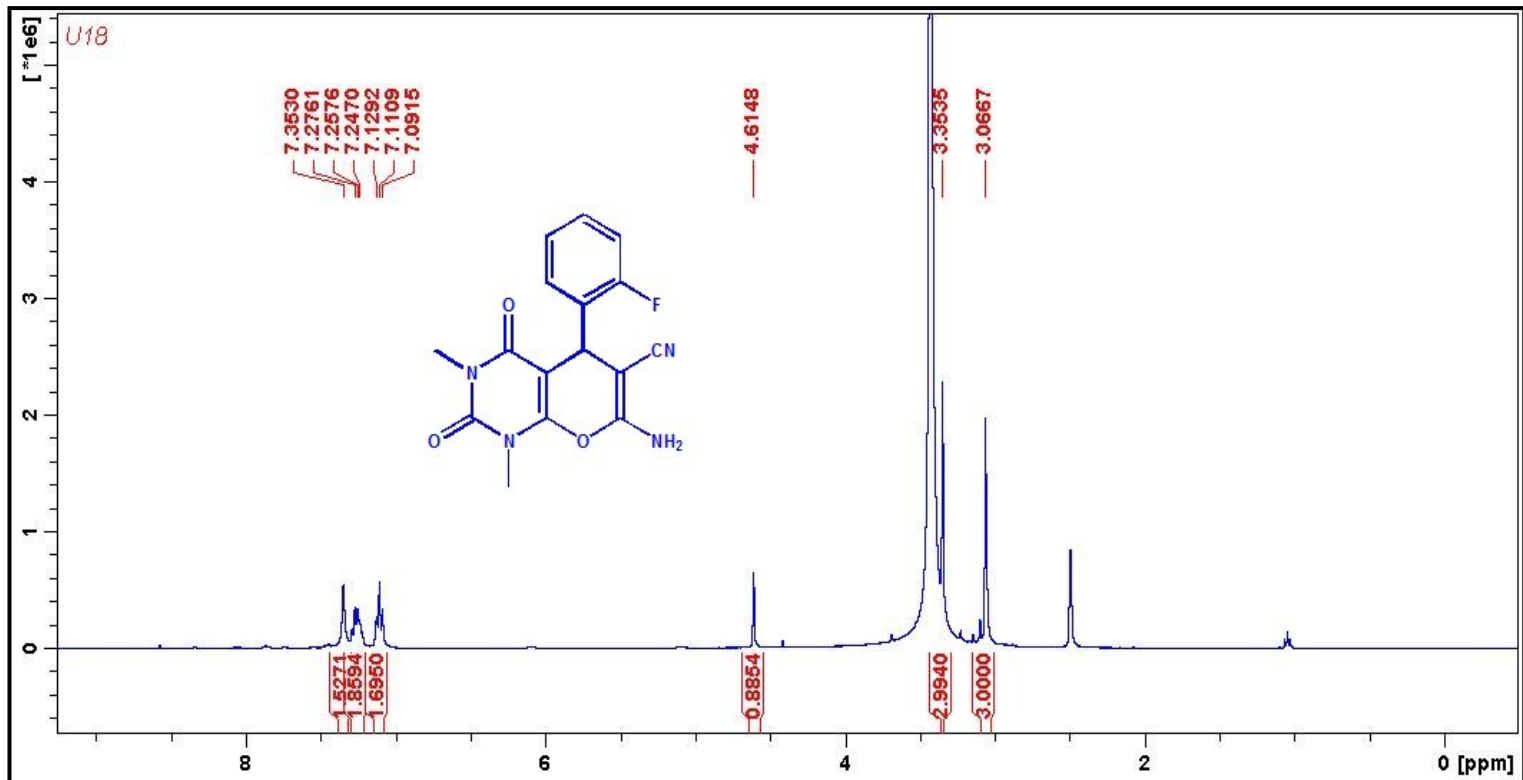

<sup>1</sup>H NMR spectra of compound 4j

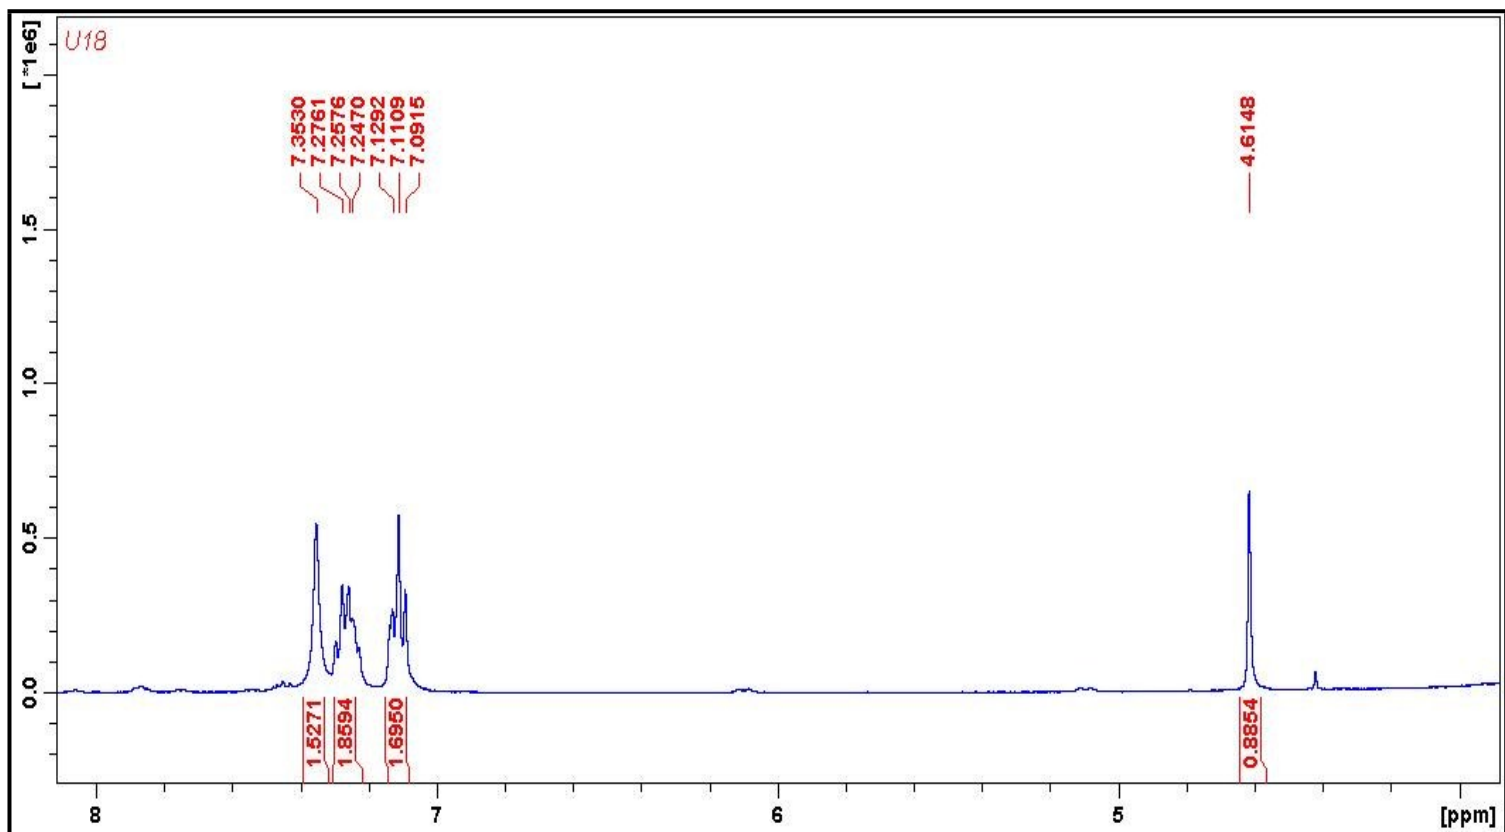

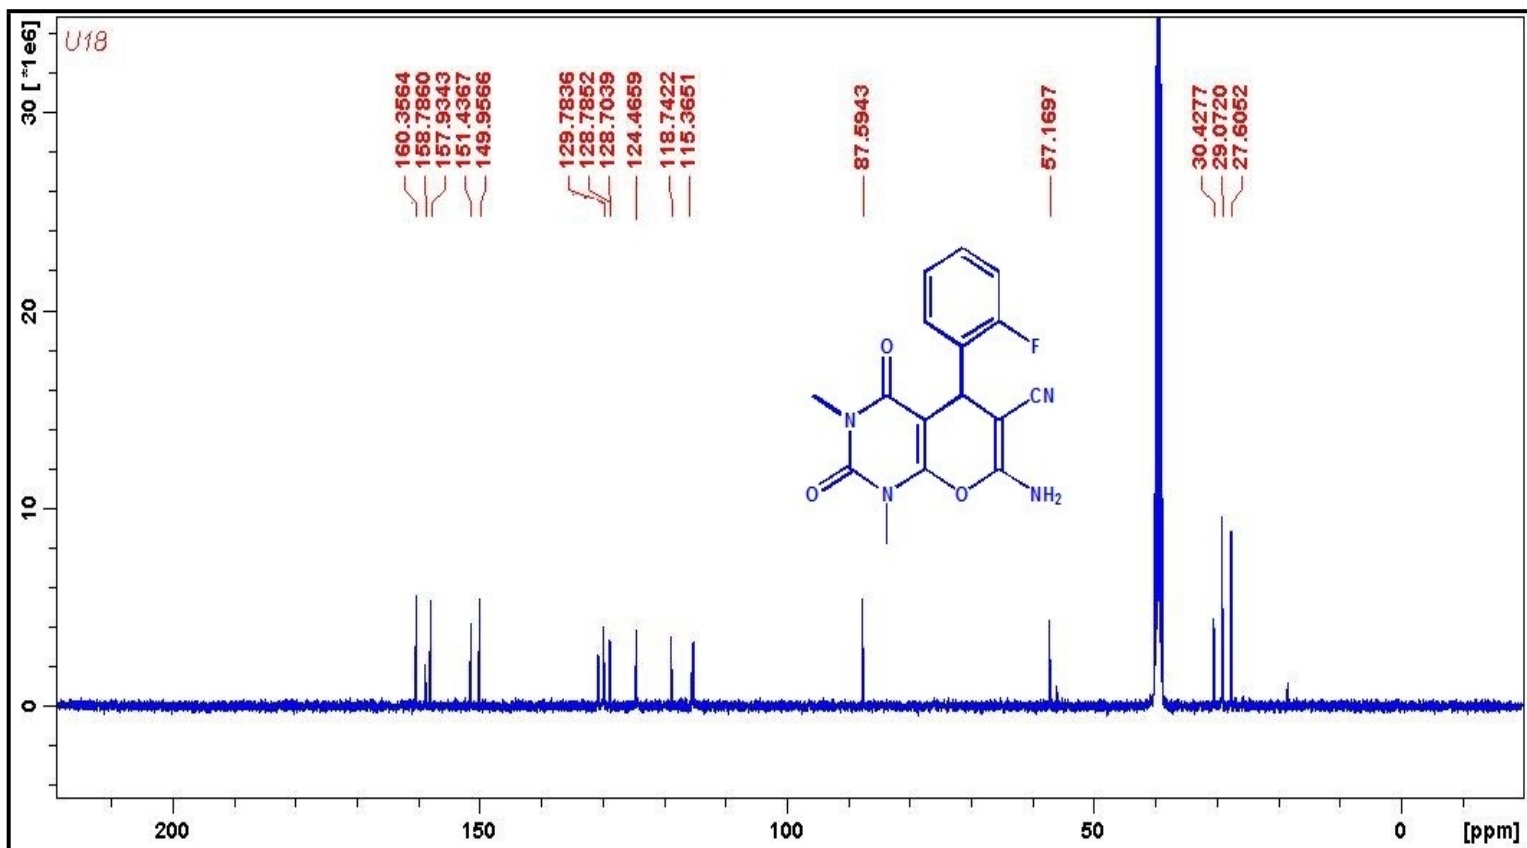

<sup>13</sup>C NMR spectra of compound 4j

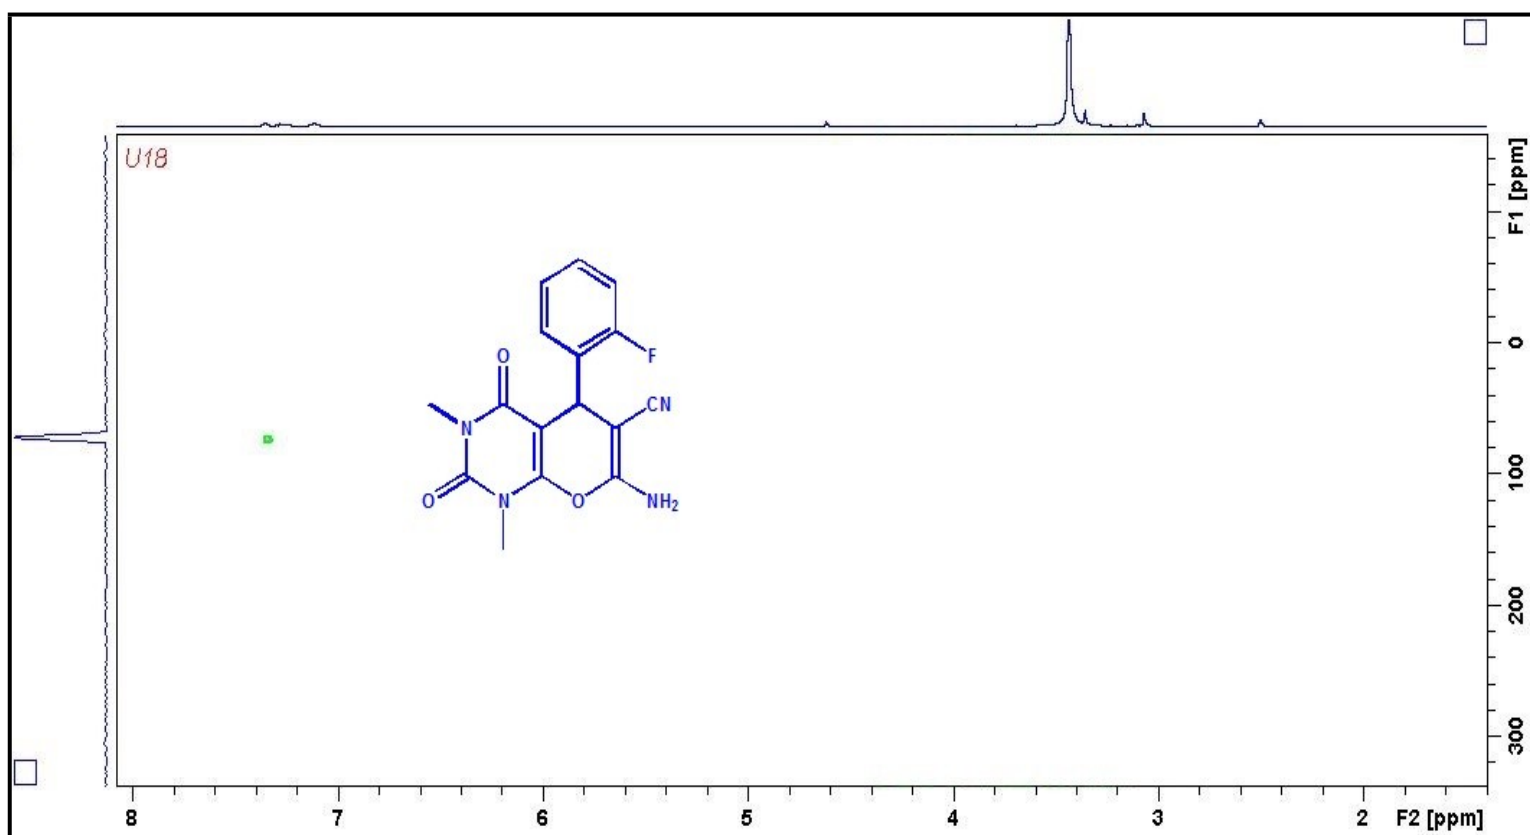

<sup>15</sup>N NMR (GHSQC) spectra of compound 4j

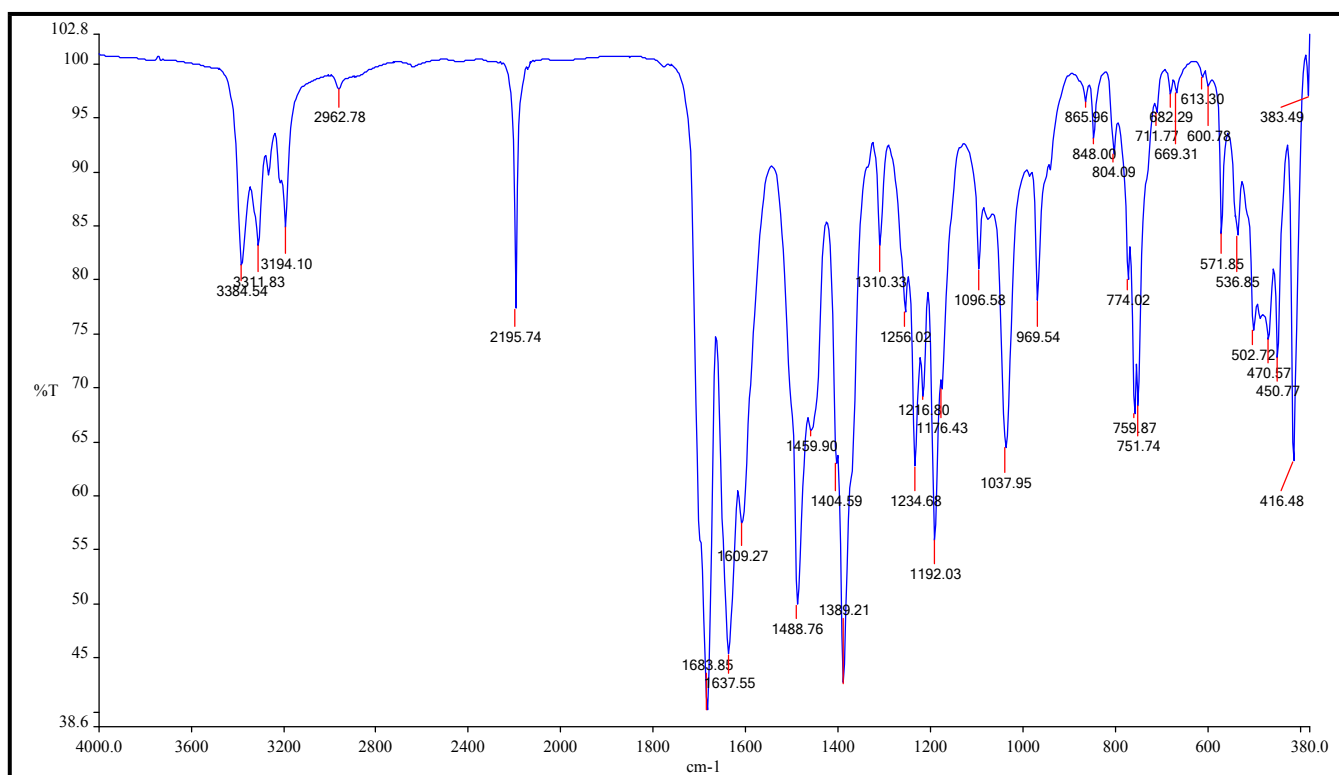

**FT-IR spectra of compound 4j**

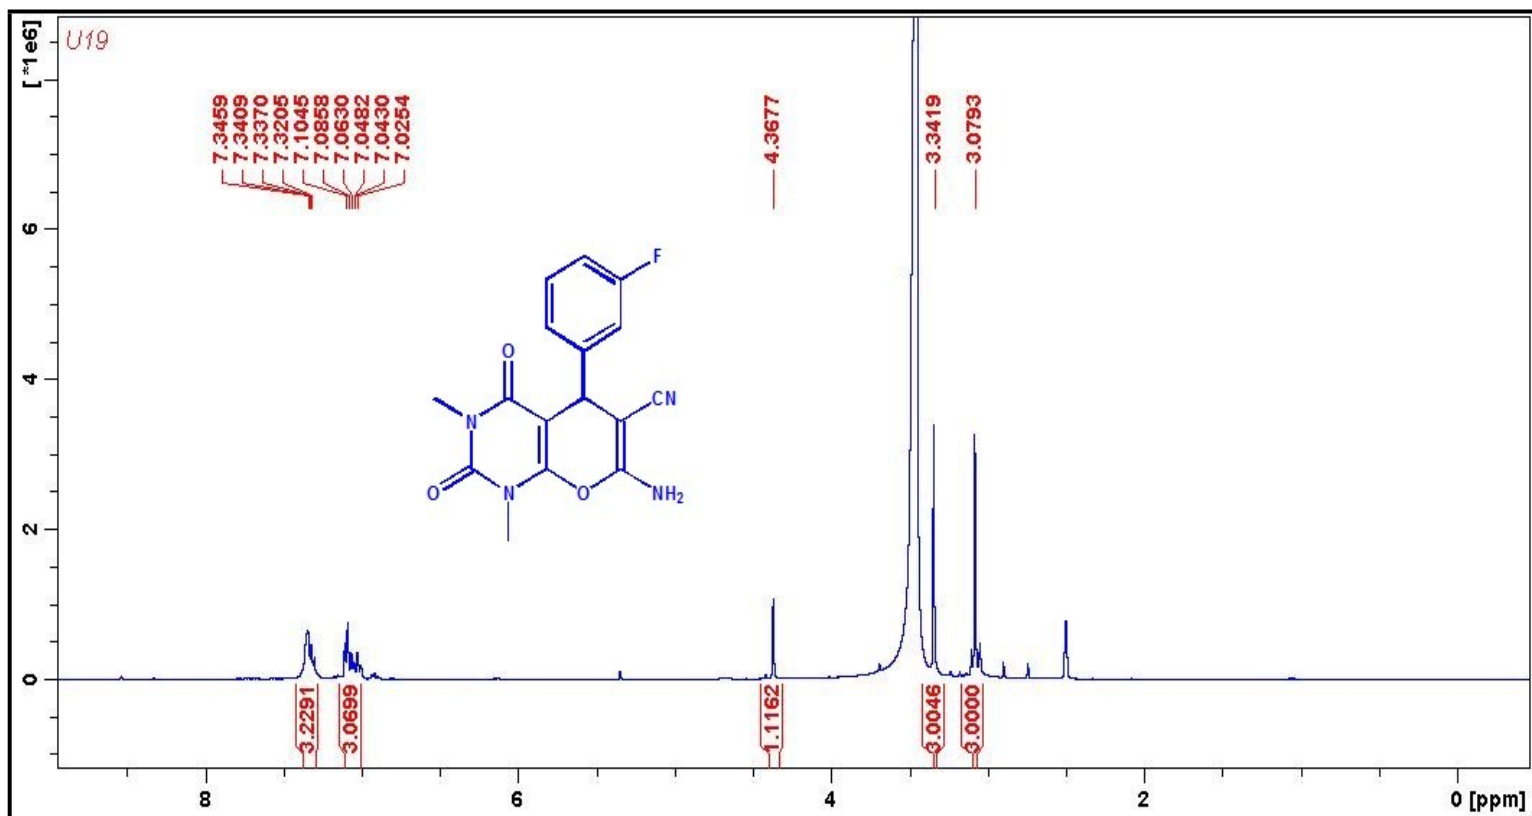

<sup>1</sup>H NMR spectra of compound 4k

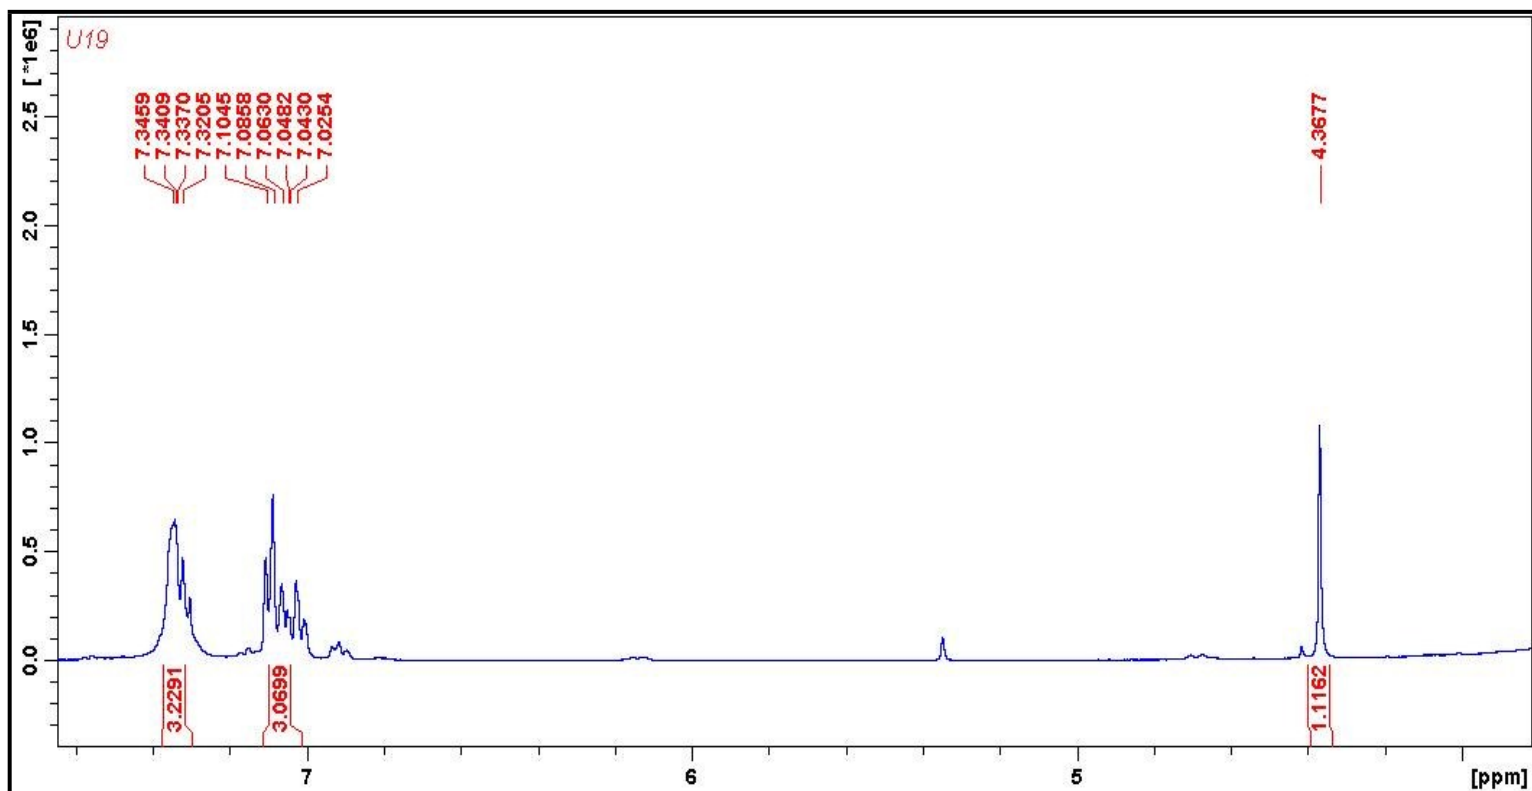



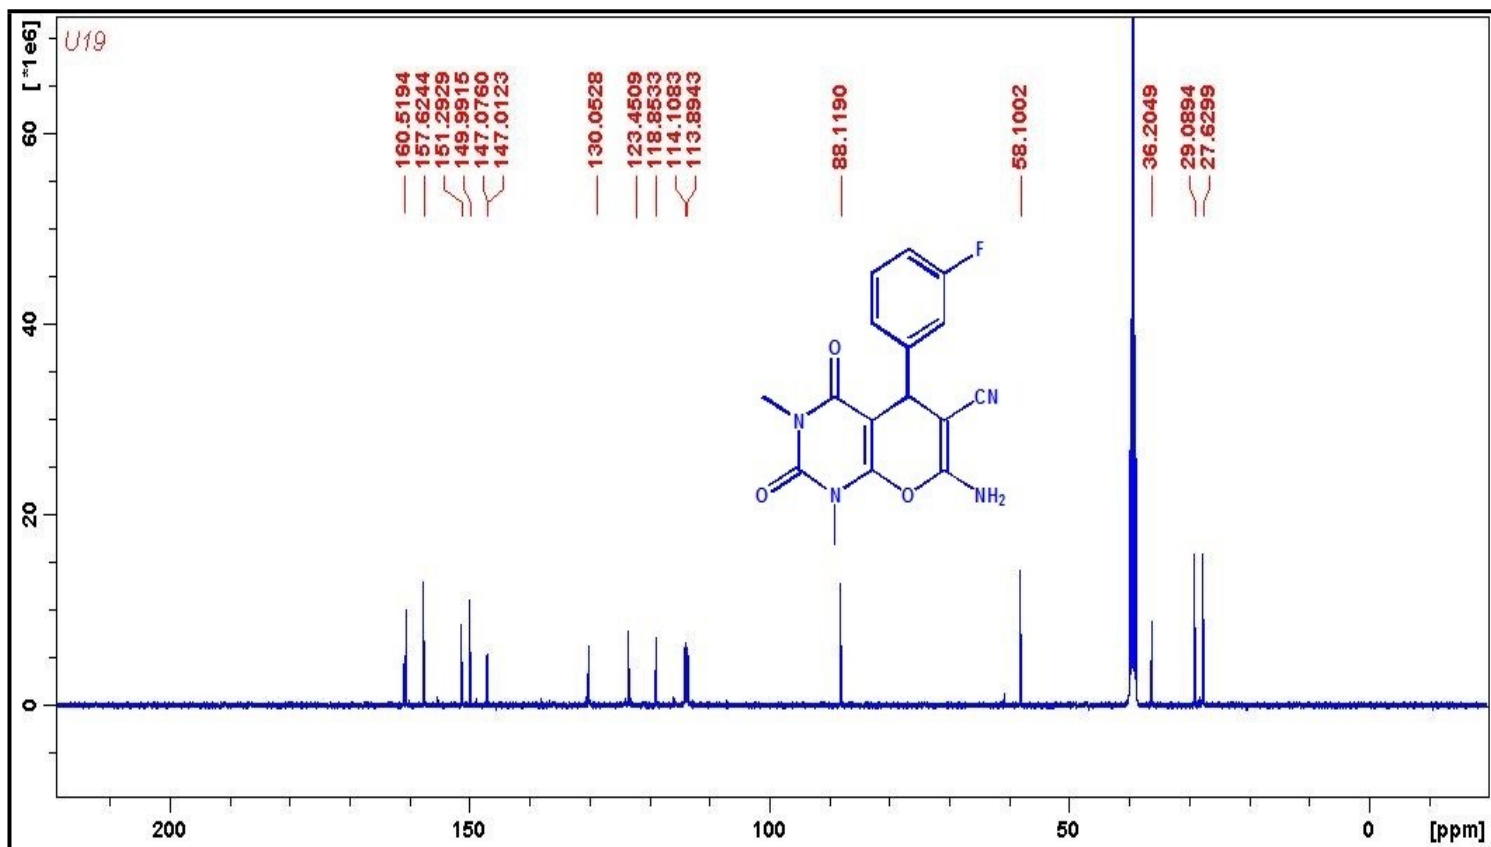

<sup>13</sup>C NMR spectra of compound 4k

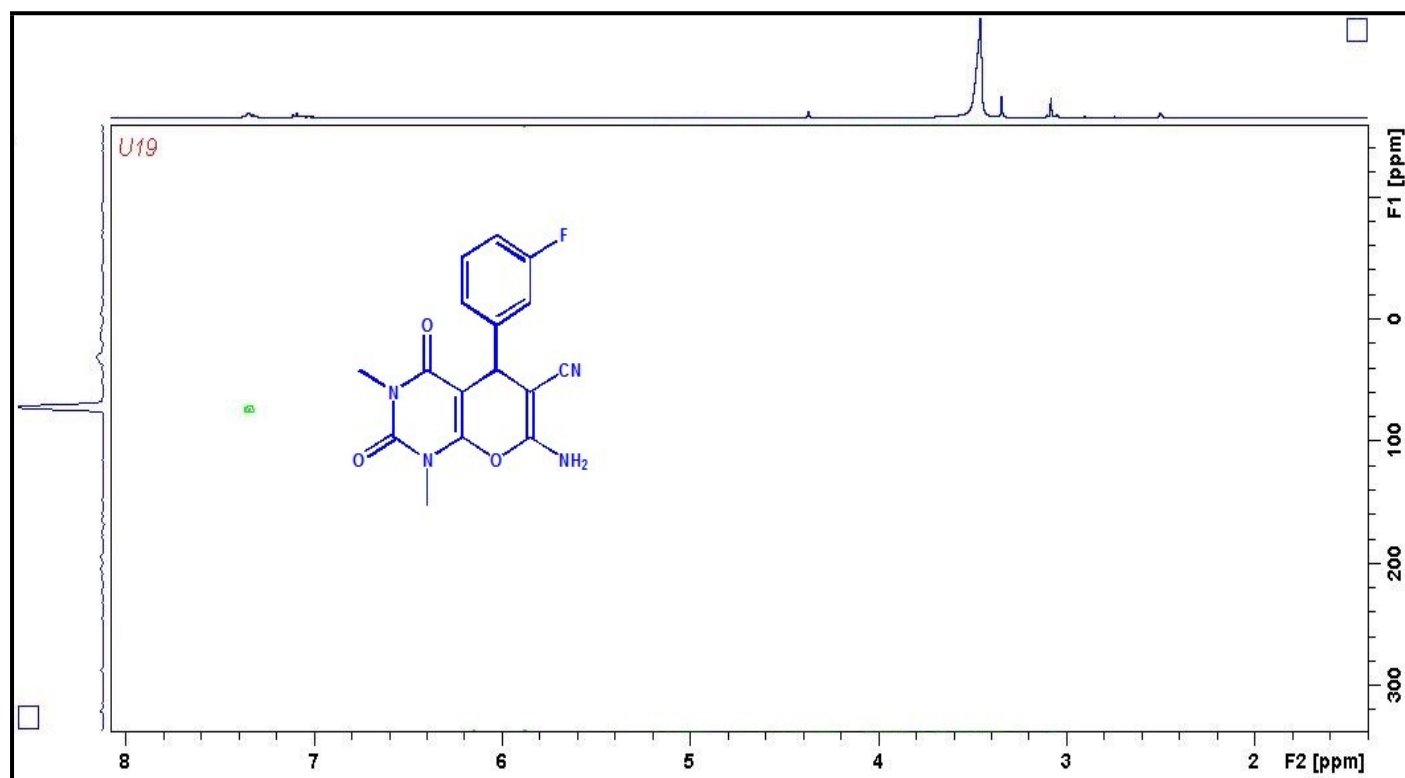

<sup>15</sup>N NMR (GHSQC) spectra of compound 4k

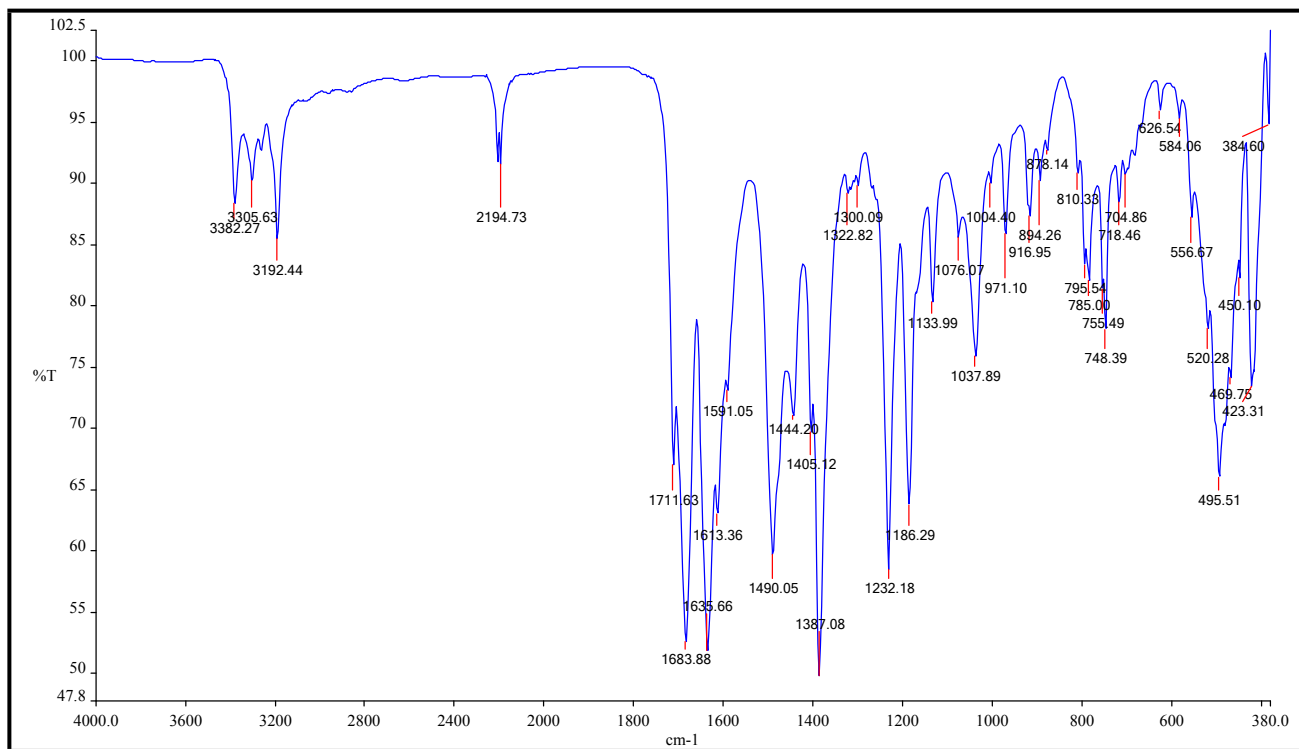

**FT-IR spectra of compound 4k**
